# Supplementary material for: Integrated detection of natural antisense transcripts using strand-specific RNA sequencing data
Source: HighWire-hosted journal article supplement (doi:10.1101/gr.149310.112), 2013-07-01
Supplement: Supplemental_Figure_Legends.docx [file Supplemental_Figure_Legends.docx]

**Supplemental Figure Legends:**

**Supplemental Figure 1.** Strand-specific RNA-seq protocol.

**Supplemental Figure 2.** The number of cis-NAT pairs identified at different sequencing depth. Above 15 million reads, the sequencing depth matters little for how many NAT pairs are detected.

**Supplemental Figure 3.** A) Number of orphan antisense RNAs from each biological sample. B) Screen shot of an orphan antisense gene, AT5G49440, illustrates the read distribution. The gene is on the forward strand of the genome. Red reads map to the unexpected strand and blue reads map to the expected strand. C) Screen shot of another orphan antisense gene, AT1G21310, illustrates the reads that are mapped to two segment of an annotated gene. The gene is on the reverse strand. Read reads map to the expected strand of the annotated gene and green reads map to the unexpected strand of the annotated gene. Screen shot were taken using IGV (<http://www.broadinstitute.org/igv/>)

**Supplemental Figure 4.** Comparison of expression levels of PolyA seq data for *cis*-NAT genes and control genes. Boxplot of the polyA clusters (PACs) expression levels are shown. For a pair of genes that are supported by multiple PACs, the sum of the expression levels of all the supporting PACs is used.

**Supplemental Figure 5.** Experimental validation of five pairs of predicted *cis*-NAT genes.

**Supplemental Figure 6.** Cumulative frequency of minor gene fraction (Ψ) in ENDO and CORT samples.

**Supplemental Figure 7.** Distribution of chromatin marks in *cis*-NAT pairs. A) and B) Cumulative distribution of gene expression levels of major genes and minor genes. C) and D) Distribution of H3K27me3 around the transcription start sites of major and minor genes.

**Supplemental Figure 8.** Screen shots of small RNA distribution in the *cis*-NAT pairs. A) Reads of small RNAs are exclusively mapped to one gene (AT1G14800) in the pair of AT1G14800 and AT1G14810. B) Read of small RNAs are mapped to the 5’ end of AT4G00975.

**Supplemental Tables:**

Supplemental Table 1: RNA seq samples of 12 libraries.

Supplemental Table 2: Read mapping statistics for 12 libraries.

Supplemental Table 3: Gene sets used in the analysis

Supplemental Table 4: Known *cis*-NAT pairs with opposite expression in ENDO and CORT samples.

Supplemental Table 5: Predicted *cis*-NAT pairs with opposite expression in ENDO and CORT samples.

Supplemental Table 6: *cis*-NAT pairs that contain mapped siRNA reads.

Supplemental Table 7: Primers used in the RT-PCR validation.

Supplemental Table 8: Prediced *cis*-NAT pairs in whole root, endodermis and cortex samples.
