# Supplementary material for: Integrated detection of natural antisense transcripts using strand-specific RNA sequencing data
Source: HighWire-hosted journal article supplement (doi:10.1101/gr.149310.112), 2013-07-01
Supplement: Supplemental_Tables.xlsx [file Supplemental_Tables.xlsx]

## Sheet: Supplemental Table 1
Supplemental Table 1: RNA seq samples of 12 libraries.
	label	starting	yield	polyA 2%	fold amp	protocol efficiency
1	uWR1	10mg	N/A	N/A	N/A	0.0252
2	uWR2	100ng	17mg	2	8500	0.0295
3	uWR3	10ng	3mg	0.2	15000	0.0313
4	WR1	28ng	4.6mg	0.56	7666.67	0.02447
5	WR2	26ng	10mg	0.52	19230.8	0.027377
6	WR3	33ng	10mg	0.66	15151.5	0.023873
7	ENDO1	20ng	1.9mg	0.4	4750	0.030684
8	ENDO2	37ng	8.9mg	0.74	12027	0.034947
9	ENDO3	10.6ng	3mg	0.2	15000	0.033424
10	CORT1	100ng	13.6mg	2	6800	0.027247
11	CORT2	14.8ng	4.6mg	0.2	23000	0.03309
12	CORT3	40ng	8.8mg	0.8	11000	0.029153

## Sheet: Supplemental Table 2
Supplemental Table 2: Read mapping statistics for 12 libraries.
	unWR1	unWR2	unWR3	WR1	WR2	WR3	ENDO1	ENDO2	ENDO3	CORT1	CORT2	CORT3	Average	Total
Total Reads	37326404	36978023	45864915	40528905	38872645	35112703	44428040	52098279	42433183	41873905	51196302	46938666	4.28043e+07	513651970
Number of uniquely mapped reads	9963748	8918240	8866238	9940616	7689558	8868941	10699967	12291931	9845857	9625392	14199265	10523073	1.01194e+07	121432826
Number of reads mapped to two Locations	216059	371146	1025235	368926	827798	247974	223191	471515	276270	186749	405418	493839
Percentage of dual mapped reads to uniquely mapped reads	0.0212243	0.0399538	0.103648	0.0357849	0.0971896	0.0271993	0.0204328	0.0369426	0.0272937	0.0190324	0.0277595	0.0448255	0.0417739
Strand-specific Protocol Efficiency (PE)	NA	NA	NA	0.02447	0.027377	0.023873	0.030684	0.034947	0.033424	0.027247	0.03309	0.029153

## Sheet: Supplemental Table 3
Supplemental Table 3: gene sets used in the analysis
name of gene pairs	evidence	Gene Strandness	Expression Levels	Genomic Organization
Postive Training	From Wang et al., 2006	two genes are on opposite strands	> 5 reads for each gene	overlapping genes
TAIR10	overlapping in TAIR10 annotation, not inclued in Wang et al., 2006	two genes are on opposite strands	> 5 reads for each gene	overlapping genes
Known	Postive Training + TAIR10	two genes are on opposite strands	> 5 reads for each gene	overlapping genes
Novel (Newly Predicted)	high BIC score, FDR<=0.05	two genes are on opposite strands	> 5 reads for each gene	intergenic distance of the two genes < 500bp
Negative Control	low BIC score, FDR>0.05	two genes are on opposite strands	> 5 reads for each gene	intergenic distance of the two genes < 500bp
Negative Training	not overlapping in TAIR10 annotation	two genes are on opposite strands	> 5 reads for each gene	intergenic distance of the two genes > 500bp, at least 500 bp away from any upstream and downstream genes
Constitutive Pairs	Postive Training + TAIR10, found in all three biological samples	two genes are on opposite strands	> 5 reads for each gene, in all three biological samples	overlapping genes + intergenic distance of the two genes < 500bp

## Sheet: Supplemental Table 4
Supplemental Table 4: Known cis-NAT pairs with opposite expression patterns in ENDO and CORT samples
Left Gene ID	Right Gene ID	ENDO Fraction	CORT Fraction
AT2G32800	AT2G32810	0.418395	0.945021
AT4G17270	AT4G17280	0.805841	0.276351
AT1G28100	AT1G28110	0.713251	0.0442411
AT2G27460	AT2G27470	0.643851	0.249524
AT1G15030	AT1G15040	0.519809	0.340899
AT4G01790	AT4G01800	0.328154	0.872674
AT5G45030	AT5G45040	0.545861	0.0493203
AT5G08540	AT5G08550	0.370647	0.590665
AT3G10620	AT3G10630	0.462211	0.727534
AT1G79380	AT1G79390	0.533423	0.484022
AT1G09750	AT1G09760	0.994304	0.496528
AT5G51680	AT5G51690	0.135266	0.936089
AT3G62830	AT3G62840	0.616159	0.0929953
AT5G54920	AT5G54930	0.554564	0.405212
AT1G49720	AT1G49730	0.403448	0.704385
AT5G24830	AT5G24840	0.692339	0.363107
AT1G69370	AT1G69380	0.506443	0.411667
AT1G50480	AT1G50490	0.600858	0.120624
AT3G59940	AT3G59950	0.577334	0.206735
AT5G61290	AT5G61300	0.990665	0.280641
AT5G16930	AT5G16940	0.307985	0.882983
AT3G56030	AT3G56040	0.481247	0.639773
AT2G41490	AT2G41500	0.658094	0.299366
AT3G13610	AT3G13620	0.982259	0.21866
AT3G10350	AT3G10360	0.428212	0.575681
AT3G06780	AT3G06790	0.50317	0.121324
AT4G10100	AT4G10110	0.5883	0.27335
AT5G53330	AT5G53340	0.453912	0.634211
AT5G05987	AT5G05990	0.590043	0.218908
AT4G29210	AT4G29220	0.696947	0.424109
AT1G36380	AT1G36390	0.647601	0.297004
AT1G06650	AT1G06660	0.834623	0.0791827
AT5G22830	AT5G22840	0.68408	0.290605
AT1G69060	AT1G69070	0.75293	0.407021
AT4G23530	AT4G23540	0.648803	0.160643
AT1G18030	AT1G18040	0.546217	0.199164
AT2G20890	AT2G20900	0.504211	0.286133
AT5G19940	AT5G19950	0.586114	0.0877306
AT4G29510	AT4G29520	0.289423	0.728146
AT1G50560	AT1G50570	0.74658	0.205119
AT5G04750	AT5G04760	0.732874	0.488668
AT5G54270	AT5G54280	0.989836	0.354272
AT2G45510	AT2G45520	0.866292	0.380174
AT5G07940	AT5G07950	0.659613	0.288794
AT5G20590	AT5G20600	0.801846	0.413122
AT4G15545	AT4G15550	0.663917	0.461477
AT5G58140	AT5G58150	0.764471	0.0702311
AT5G09230	AT5G09240	0.641691	0.176138
AT3G63400	AT3G63410	0.463208	0.686955
AT5G48870	AT5G48880	0.096127	0.823007
AT5G44030	AT5G44040	0.806501	0.174166
AT5G61210	AT5G61220	0.567417	0.39836
AT2G47980	AT2G47990	0.577493	0.172277
AT2G26170	AT2G26180	0.525259	0.185496
AT5G02120	AT5G02130	0.764733	0.335266
AT5G66180	AT5G66190	0.175773	0.530676
AT2G46225	AT2G46230	0.790506	0.306863
AT4G28040	AT4G28050	0.655642	0.215982
AT4G33100	AT4G33110	0.238494	0.500163
AT5G39970	AT5G39980	0.531834	0.0422191
AT5G67530	AT5G67540	0.356227	0.596896
AT4G13580	AT4G13590	0.013639	0.704218
AT1G75170	AT1G75180	0.437281	0.502075
AT5G05750	AT5G05760	0.272217	0.542707
AT3G07690	AT3G07700	0.275637	0.54561
AT1G02420	AT1G02430	0.0926803	0.632767
AT5G10830	AT5G10840	0.448237	0.511457
AT1G20540	AT1G20550	0.441973	0.526279
AT3G52030	AT3G52040	0.51756	0.171899
AT3G61370	AT3G61380	0.00386136	0.639956
AT2G42270	AT2G42280	0.298928	0.652834
AT1G72180	AT1G72190	0.364409	0.519862
AT4G15475	AT4G15480	0.0282795	0.741518
AT4G00490	AT4G00500	0.441246	0.500668
AT4G02400	AT4G02405	0.272542	0.82667
AT5G24380	AT5G24390	0.0812965	0.775687
AT2G37990	AT2G38000	0.248769	0.738527
AT4G35850	AT4G35860	0.330245	0.643131
AT3G24020	AT3G24030	0.0116726	0.500357
AT3G14270	AT3G14280	0.551252	0.439754
AT1G15810	AT1G15820	0.185259	0.675967
AT5G42180	AT5G42190	0.0486544	0.876194
AT3G22620	AT3G22630	0.0657719	0.878254
AT5G19840	AT5G19850	0.332288	0.82433
AT2G39430	AT2G39435	6.69314e-05	0.788517
AT1G79710	AT1G79720	0.200879	0.51335
AT4G16267	AT4G16270	0.99544	0.278354
AT1G33415	AT1G33420	0.595728	0.376712
AT1G76850	AT1G76860	0.607858	0.328288
AT3G56408	AT3G56410	0.405987	0.921224
AT4G38550	AT4G38552	0.835205	0.115529
AT2G44130	AT2G44140	0.498356	0.517595
AT2G23740	AT2G23755	0.314826	0.643657
AT5G67570	AT5G67580	0.491701	0.617887
AT2G24540	AT2G24545	0.673056	0.418461
AT4G37430	AT4G37432	0.667513	0.162223
AT1G22500	AT1G22510	0.912347	0.256831
AT3G15518	AT3G15520	0.274257	0.815848
AT1G03545	AT1G03550	0.374138	0.549366
AT1G13160	AT1G13170	0.347291	0.794335
AT5G60040	AT5G60050	0.456004	0.823702
AT1G16489	AT1G16490	0.724962	0.10228
AT4G36050	AT4G36052	0.360806	0.687113
AT2G22000	AT2G22010	0.168854	1
AT2G43840	AT2G43850	0.245924	0.968751
AT3G54080	AT3G54085	0.400466	0.67291
AT1G64560	AT1G64561	0.669357	0.49699
AT5G51130	AT5G51140	0.446221	0.685131
AT4G05400	AT4G05410	0.532521	0.362707
AT4G05190	AT4G05200	0.0574123	0.982166
AT4G14830	AT4G14840	0.654049	0.402824
AT4G38540	AT4G38545	0.694439	0.00228646
AT2G37530	AT2G37540	0.25317	0.748878
AT5G47530	AT5G47540	0.16388	0.934524
AT5G67210	AT5G67220	0.70073	0.432236
AT5G22070	AT5G22080	0.615117	0.402068
AT1G17750	AT1G17760	0.681263	0.476466
AT2G24180	AT2G24190	0.654023	0.426545
AT5G51380	AT5G51390	0.330256	0.686533
AT1G51400	AT1G51402	0.68285	0.0888645
AT1G51390	AT1G51400	0.0622113	0.531555
AT1G80320	AT1G80325	0.722653	0.169023
AT2G35658	AT2G35660	0.258976	0.588404
AT5G64330	AT5G64341	0.522387	0.236116
AT5G64330	AT5G64343	0.531929	0.24309
AT5G64330	AT5G64342	0.533109	0.243964
AT3G33520	AT3G33530	0.491729	0.761895
AT5G56120	AT5G56130	0.495367	0.978428
AT5G39590	AT5G39600	0.649413	0.338488
AT3G24190	AT3G24200	0.510546	0.0923759
AT4G40042	AT4G40045	0.543886	0.364551
AT2G01620	AT2G01630	0.924292	0.458445
AT5G58790	AT5G58800	0.188221	0.914205
AT1G22940	AT1G22950	0.76249	0.421311
AT2G34410	AT2G34420	0.138686	0.799593
AT5G14710	AT5G14720	0.431565	0.553309
AT5G10460	AT5G10470	0.268438	0.58199
AT1G09290	AT1G09300	0.343167	0.686224
AT1G05835	AT1G05840	0.77315	0.493403
AT5G17360	AT5G17370	0.571413	0.438812
AT4G20360	AT4G20362	0.289762	0.678005
AT5G18290	AT5G18300	0	0.710363
AT1G71940	AT1G71950	0.668007	0.489302
AT3G14120	AT3G14130	0.405919	0.663964
AT5G22100	AT5G22110	0.240252	0.540381
AT5G47960	AT5G47970	0.611203	0.276234
AT2G19710	AT2G19720	0.693269	0.355945
AT1G60670	AT1G60680	0.544912	0.0744675
AT1G49350	AT1G49360	0.502691	0.323481
AT5G53360	AT5G53370	0.154439	0.970571
AT3G04810	AT3G04820	0.544405	0.252244
AT3G25980	AT3G25990	0.0933518	0.766659

## Sheet: Supplemantal Table 5
Supplemental Table 5: Predicted cis-NAT pairs with opposite expression in ENDO and CORT samples
Left Gene ID	Right Gene ID	ENDO Fraction	CORT Fraction	ENDO left exp	ENDO right exp	CORT left exp	CORT right exp	Left Gene Function	Right Gene Function
AT1G78600	AT1G78610	0.774787	0.293942
AT5G06930	AT5G06940	0.735778	0.0110307
AT3G52250	AT3G52260	0.522122	0.303836
AT1G07250	AT1G07260	0.555284	0.0378686
AT2G48020	AT2G48030	0.716541	0.097747
AT4G00895	AT4G00900	0.748609	0.426398
AT1G09900	AT1G09910	0.252846	0.700311
AT1G30620	AT1G30630	0.391958	0.573027
AT4G39270	AT4G39280	0.936438	0.475231
AT3G10310	AT3G10320	0.0357072	0.817991
AT3G17920	AT3G17930	0.58509	0.241245
AT2G41820	AT2G41830	0.699129	0.419827
AT3G50100	AT3G50110	0.380659	0.882728
AT5G27650	AT5G27660	0.667587	0.450384
AT5G07720	AT5G07730	0.67104	0.288133
AT2G31970	AT2G31980	0.429261	0.634827
AT5G66590	AT5G66600	0.863106	0.025103
AT1G06420	AT1G06430	0.241388	0.762212
AT1G13110	AT1G13120	0.934383	0.318343
AT1G80310	AT1G80325	0.605217	0.0689361
AT4G31985	AT4G31990	0.174641	0.608038
AT1G72320	AT1G72330	0.20082	0.585266
AT5G21280	AT5G21970	0.694589	0.0912142
AT4G36540	AT4G36550	0.487173	0.796358
AT4G16270	AT4G16280	0.0671102	0.788803
AT1G15240	AT1G15250	0.634997	0.342018
AT5G08340	AT5G08350	0.602053	0.213762
AT1G19850	AT1G19860	0.443621	0.925503
AT4G13860	AT4G13870	0.560063	0.100328
AT1G30455	AT1G30460	0.574093	0.15094
AT1G79460	AT1G79470	0.791498	0.40052
AT3G47690	AT3G47700	0.489335	0.950414
AT1G70518	AT1G70520	0.445399	0.657026
AT3G22780	AT3G22790	0.490779	0.551506
AT3G12360	AT3G12370	0.643227	0.373086
AT1G56170	AT1G56180	0.464209	0.719679
AT1G50410	AT1G50420	0.779593	0.434208
AT3G53000	AT3G53010	0.232366	0.555571
AT5G25050	AT5G25060	0.67734	0.366434
AT4G16150	AT4G16155	0.507486	0.280216
AT5G10510	AT5G10520	0.583462	0.157038
AT4G37300	AT4G37310	0	0.520517
AT2G42650	AT2G42660	0.0193343	0.859987
AT3G07200	AT3G07210	0.487292	0.902862
AT1G31860	AT1G31870	0.201978	0.505744
AT3G63520	AT3G63530	0.526765	0.0483832
AT3G54826	AT3G54830	0.0871213	0.799503
AT4G17215	AT4G17220	0.356814	0.919023
AT1G60190	AT1G60200	0.509179	0.27711
AT1G01920	AT1G01930	0.369276	0.661405
AT3G58570	AT3G58580	0.459836	0.637572
AT1G75200	AT1G75210	0.466817	0.79705
AT3G12930	AT3G12940	0.253884	0.664904
AT2G39190	AT2G39200	0.336937	0.728279
AT5G05230	AT5G05240	0.534435	0.44244
AT4G34600	AT4G34610	0.34324	0.606818
AT2G28320	AT2G28330	0.528739	0.152063

## Sheet: Supplemental Table 6
Supplmental Table 6
cis-NAT pairs that contain mapped small RNA reads.
Gene 1	Gene 2	Sample	RPM
ATMG01390	ATMG01400	WR	2553.11
AT1G10522	AT1G10530	WR	1694
AT3G41761	AT3G41762	WR	1605.56
AT4G00975	AT4G00980	WR	1364.37
AT1G62580	AT1G62590	WR	470.148
AT1G14800	AT1G14810	WR	276.963
AT2G34100	AT2G34110	WR	267.852
AT2G47010	AT2G47020	WR	261.407
AT3G43260	AT3G43270	WR	180.963
AT2G45360	AT2G45380	WR	136.889
AT1G25097	AT1G25098	WR	96.2222
AT3G60950	AT3G60955	WR	87.7778
AT4G02970	AT4G02980	WR	84.6667
AT1G66870	AT1G66880	WR	83.4815
AT2G17500	AT2G17510	WR	74.963
AT2G20940	AT2G20950	WR	74.7407
AT2G34780	AT2G34790	WR	73.4815
AT2G34080	AT2G34110	WR	68.5926
AT4G02700	AT4G02710	WR	61.037
AT5G15022	AT5G15030	WR	56.2963
AT4G39270	AT4G39280	WR	54.4444
AT1G18880	AT1G18890	WR	53.7037
AT1G16810	AT1G16820	WR	50.8148
AT2G31140	AT2G31141	WR	50.5926
AT1G18740	AT1G18745	WR	49.7037
AT1G03810	AT1G03820	WR	49.6296
AT3G16460	AT3G16470	WR	49.037
AT1G53400	AT1G53420	WR	48.7407
AT5G10340	AT5G10350	WR	48.5926
AT3G52700	AT3G52710	WR	46.6667
AT1G76878	AT1G76880	WR	44.6667
AT2G07681	AT2G07682	WR	43.7037
AT5G27650	AT5G27660	WR	42.8889
AT4G11070	AT4G11080	WR	42.2963
AT2G05810	AT2G05812	WR	40.963
AT3G09250	AT3G09260	WR	40.5926
AT4G35760	AT4G35770	WR	40.2222
AT1G50440	AT1G50450	WR	39.6296
AT1G65347	AT1G65350	WR	38.2963
AT3G13850	AT3G13860	WR	36.5926
AT1G33415	AT1G33420	WR	32.8148
AT4G17380	AT4G17390	WR	32.4444
AT1G12810	AT1G12820	WR	30
AT4G33290	AT4G33300	WR	28.963
AT3G29642	AT3G29644	WR	27.2593
AT3G06895	AT3G06910	WR	27.1852
AT4G28070	AT4G28080	WR	26.5926
AT1G07250	AT1G07260	WR	26.2963
AT2G26340	AT2G26350	WR	26
AT2G10405	AT2G10410	WR	23.9259
AT3G24518	AT3G24520	WR	22.2222
AT1G42980	AT1G42990	WR	22.1481
AT3G60910	AT3G60920	WR	21.7778
AT4G13270	AT4G13280	WR	21.4074
AT1G03410	AT1G03420	WR	20.8148
AT1G53480	AT1G53490	WR	20.2222
AT2G07697	AT2G07798	WR	19.7037
AT4G14548	AT4G14550	WR	19.4815
AT4G14500	AT4G14510	WR	19.037
AT2G24750	AT2G24755	WR	18.5926
AT5G64680	AT5G64685	WR	18.1481
AT2G07599	AT2G07785	WR	18.0741
AT1G29418	AT1G29420	WR	17.8519
AT3G15730	AT3G15740	WR	16.1481
AT2G44430	AT2G44440	WR	14.7407
AT4G39170	AT4G39180	WR	14.5185
AT4G16900	AT4G16915	WR	14.5185
AT5G65620	AT5G65630	WR	14.3704
AT4G33300	AT4G33310	WR	14.2963
AT1G06000	AT1G06002	WR	14
AT1G65960	AT1G65970	WR	13.2593
AT5G11170	AT5G11180	WR	12.963
AT2G04150	AT2G04160	WR	12.4444
AT4G01533	AT4G01535	WR	11.7037
AT3G47800	AT3G47810	WR	11.6296
AT2G25270	AT2G25280	WR	10.7407
AT4G04320	AT4G04330	WR	10.6667
AT2G13550	AT2G13560	WR	10.6667
AT4G19080	AT4G19090	WR	10.6667
AT5G28919	AT5G28920	WR	10.5185
AT2G45310	AT2G45320	WR	10.5185
AT2G45530	AT2G45540	WR	10.3704
AT5G13840	AT5G13850	WR	10.2222
AT2G45310	AT2G45315	WR	10.0741
AT2G04378	AT2G04380	WR	10.0741
Gene 1	Gene 2	Sample	RPM
AT3G41761	AT3G41762	ENDO	563.997
ATMG01390	ATMG01400	ENDO	400.908
AT1G62580	AT1G62590	ENDO	382.535
AT1G15405	AT1G15410	ENDO	226.672
AT2G03330	AT2G03340	ENDO	174.236
AT4G00975	AT4G00980	ENDO	133.774
AT2G47010	AT2G47020	ENDO	132.122
AT1G18740	AT1G18745	ENDO	113.955
AT1G14800	AT1G14810	ENDO	99.5045
ATMG00400	ATMG00410	ENDO	82.3699
AT1G18300	AT1G18310	ENDO	63.7903
AT2G45360	AT2G45380	ENDO	43.559
AT1G18880	AT1G18890	ENDO	42.5268
AT5G37390	AT5G37400	ENDO	40.256
AT4G02970	AT4G02980	ENDO	39.8431
AT1G25097	AT1G25098	ENDO	39.4302
AT1G71760	AT1G71770	ENDO	36.9529
AT4G02700	AT4G02710	ENDO	25.5987
AT5G40440	AT5G40450	ENDO	25.5987
AT5G14830	AT5G14840	ENDO	25.1858
AT2G20940	AT2G20950	ENDO	23.9472
AT3G52700	AT3G52710	ENDO	23.7407
AT2G34080	AT2G34110	ENDO	21.8827
AT5G15022	AT5G15030	ENDO	19.8183
AT1G07250	AT1G07260	ENDO	19.6119
AT1G53400	AT1G53420	ENDO	17.7539
AT5G27650	AT5G27660	ENDO	16.3088
AT2G34780	AT2G34790	ENDO	15.0702
AT2G45960	AT2G45970	ENDO	14.6573
AT1G76878	AT1G76880	ENDO	13.6251
AT2G05840	AT2G05845	ENDO	13.2122
AT4G24220	AT4G24230	ENDO	13.0058
AT1G66870	AT1G66880	ENDO	12.7993
AT2G31140	AT2G31141	ENDO	11.7671
AT3G06895	AT3G06910	ENDO	11.5607
AT1G16810	AT1G16820	ENDO	10.9414
AT1G65347	AT1G65350	ENDO	10.7349
AT4G11070	AT4G11080	ENDO	10.5285
AT3G47800	AT3G47810	ENDO	10.322
AT1G78570	AT1G78580	ENDO	10.322
AT2G28670	AT2G28671	ENDO	10.322
AT4G13270	AT4G13280	ENDO	10.1156
AT3G09430	AT3G09440	ENDO	10.1156
Gene 1	Gene 2	Sample	RPM
ATMG01390	ATMG01400	CORT	973.785
AT3G41761	AT3G41762	CORT	422.239
AT2G47010	AT2G47020	CORT	397.496
AT1G62580	AT1G62590	CORT	337.113
AT2G03330	AT2G03340	CORT	254.05
AT4G02970	AT4G02980	CORT	122.239
AT1G14800	AT1G14810	CORT	114.286
AT5G40440	AT5G40450	CORT	106.333
AT4G00975	AT4G00980	CORT	101.62
AT1G78570	AT1G78580	CORT	93.3726
AT1G18740	AT1G18745	CORT	87.9234
AT1G18300	AT1G18310	CORT	67.7467
AT2G45960	AT2G45970	CORT	63.4757
AT2G45360	AT2G45380	CORT	56.4065
AT1G76878	AT1G76880	CORT	50.81
AT1G25097	AT1G25098	CORT	49.0427
AT5G13930	AT5G13940	CORT	48.7482
AT3G16460	AT3G16470	CORT	43.0044
AT1G06000	AT1G06002	CORT	41.3844
AT5G05160	AT5G05170	CORT	37.5552
AT5G43050	AT5G43060	CORT	34.3152
AT3G09250	AT3G09260	CORT	33.5788
AT1G53400	AT1G53420	CORT	31.8115
AT5G65609	AT5G65610	CORT	28.866
AT5G05410	AT5G05420	CORT	28.7187
AT2G34080	AT2G34110	CORT	28.2769
AT1G75770	AT1G75780	CORT	28.1296
AT1G16810	AT1G16820	CORT	27.5405
AT1G50010	AT1G50020	CORT	25.7732
AT3G16240	AT3G16250	CORT	24.595
AT5G27650	AT5G27660	CORT	24.3004
AT4G30960	AT4G30970	CORT	23.8586
AT2G31140	AT2G31141	CORT	23.2695
AT2G07681	AT2G07682	CORT	23.2695
AT2G05810	AT2G05812	CORT	21.944
AT1G77320	AT1G77330	CORT	21.944
AT5G04120	AT5G04130	CORT	21.0604
AT3G05900	AT3G05905	CORT	20.9131
AT5G25460	AT5G25470	CORT	20.7658
AT1G20830	AT1G20840	CORT	20.7658
AT4G24220	AT4G24230	CORT	20.4713
AT5G32690	AT5G32702	CORT	20.0295
AT5G44330	AT5G44340	CORT	19.7349
AT5G63780	AT5G63790	CORT	18.704
AT3G15730	AT3G15740	CORT	18.5567
AT2G34660	AT2G34670	CORT	18.4094
AT2G29430	AT2G29440	CORT	17.2312
AT1G65347	AT1G65350	CORT	16.6421
AT3G06895	AT3G06910	CORT	16.6421
AT3G52700	AT3G52710	CORT	16.2003
AT5G16730	AT5G16740	CORT	16.053
AT3G17380	AT3G17390	CORT	15.9057
AT1G18880	AT1G18890	CORT	15.4639
AT2G39795	AT2G39800	CORT	15.1694
AT1G65010	AT1G65020	CORT	15.1694
AT1G76630	AT1G76640	CORT	14.8748
AT1G31860	AT1G31870	CORT	14.5803
AT2G47170	AT2G47180	CORT	14.433
AT4G33290	AT4G33300	CORT	14.2857
AT3G02090	AT3G02100	CORT	13.9912
AT3G47800	AT3G47810	CORT	13.8439
AT2G30870	AT2G30880	CORT	13.6966
AT5G19780	AT5G19790	CORT	13.5493
AT3G51238	AT3G51240	CORT	13.4021
AT5G65620	AT5G65630	CORT	13.2548
AT1G35720	AT1G35730	CORT	13.2548
AT4G11070	AT4G11080	CORT	12.9602
AT3G28730	AT3G28740	CORT	12.813
AT4G21980	AT4G21990	CORT	12.813
AT3G44180	AT3G44190	CORT	12.813
AT3G51150	AT3G51160	CORT	12.813
AT2G45530	AT2G45540	CORT	12.5184
AT1G55850	AT1G55860	CORT	12.5184
AT3G09430	AT3G09440	CORT	12.2239
AT3G51540	AT3G51550	CORT	12.0766
AT4G21820	AT4G21830	CORT	11.6348
AT4G11000	AT4G11010	CORT	11.6348
AT4G25250	AT4G25260	CORT	11.6348
AT4G20890	AT4G20900	CORT	11.4875
AT4G28070	AT4G28080	CORT	11.3402
AT1G62790	AT1G62800	CORT	11.3402
AT4G02880	AT4G02890	CORT	11.3402
AT1G65840	AT1G65845	CORT	11.3402
AT2G05710	AT2G05715	CORT	10.8984
AT5G48220	AT5G48230	CORT	10.7511
AT1G15690	AT1G15700	CORT	10.7511
AT1G33415	AT1G33420	CORT	10.7511
AT2G15970	AT2G15980	CORT	10.7511
AT1G07250	AT1G07260	CORT	10.7511
AT5G08780	AT5G08790	CORT	10.4566
AT4G39030	AT4G39040	CORT	10.3093
AT1G17744	AT1G17745	CORT	10.3093
AT1G78300	AT1G78310	CORT	10.0147

## Sheet: Supplemental Table 7
Gene Name	PrimerName	PrimerSeq	Genomic Position(Left)	Genomic Position(Right)	Product(cDNA) Size	Product(size) genomic
AT2G43480	AT2G43480_L1	ACAAGACCGGTAAACCAAGCCCT	18053989	18054011	608	632
AT2G43480	AT2G43480_R1	TCTCCTTTCTCTTTTGTGCGGGAAC	18054621	18054597	608	632
AT2G43490	AT2G43480_L2	TCACCGTGAGAAAGGCTTCTCTAT	18054478	18054501	650	939
AT2G43490	AT2G43480_R2	TCCGCGTGAGAAGATGCATACG	18055417	18055396	650	939
AT2G46020	AT2G46020_L1	TCCGGGAAGCAAGGAATGCTCT	18931219	18931240	850	850
AT2G46020	AT2G46020_R1	TGCCATCTCACACCAATGAAACA	18932069	18932047	850	850
AT2G46030	AT2G46020_L2	TGTTTCATTGGTGTGAGATGGCA	18932047	18932069	444	632
AT2G46030	AT2G46020_R2	CAGACTTGGAGCCCAATGTTTGGT	18932679	18932656	444	632
AT3G10310	AT3G10310_L1	CGAGCCGTGAAAGTAGATGGCA	3194502	3194523	860	944
AT3G10310	AT3G10310_R1	AGGTGACCTGAAATGAGTTTTGAGA	3195446	3195422	860	944
AT3G10320	AT3G10320_L2	ACTCTCAAAACTCATTTCAGGTCAC	3195420	3195444	949	949
AT3G10320	AT3G10320_R2	CGGCCGTGCTATTCTCTACCG	3196369	3196349	949	949
AT3G52250	AT3G52250_L1	ACCCAACGTACAGGTGAAGGCT	19382528	19382549	1229	1229
AT3G52250	AT3G52250_R1	ATCACCTGTTATGGCATGTGTCGTC	19383757	19383733	1229	1229
AT3G52260	AT3G52250_L2	GCAACTTCACTTGCAGGAGGAT	19383419	19383440	214	524
AT3G52260	AT3G52250_R2	ATGATGCCGCAGCCTTTGCC	19383943	19383924	214	524
AT1G07250	AT1G07250_L1	GGAAGCGTTGATGAGCCGCA	2226839	2226858	718	718
AT1G07250	AT1G07250_R1	GACTGCCATAGTTTTTGCTTCTTGA	2227557	2227533	718	718
AT1G07260	AT1G07260_L2	TCAAGAAGCAAAAACTATGGCAGT	2227533	2227556	663	663
AT1G07260	AT1G07260_R2	ACGATCTGTTGCCGGAGGGA	2228196	2228177	663	663

## Sheet: Supplemental Table 8
Supplmental Table 8: Prediced cis-NAT pairs in whole root, endodermis and cortex samples
Gene Name	Gene Name	Tissue Type
AT1G76630	AT1G76640	Whole Root
AT2G06045	AT2G06050	Whole Root
AT4G30100	AT4G30110	Whole Root
AT3G63300	AT3G63310	Whole Root
AT1G50740	AT1G50750	Whole Root
AT5G18960	AT5G18970	Whole Root
AT5G07610	AT5G07620	Whole Root
AT1G59860	AT1G59865	Whole Root
AT2G13550	AT2G13560	Whole Root
AT5G07870	AT5G07880	Whole Root
AT3G11810	AT3G11820	Whole Root
AT5G43050	AT5G43060	Whole Root
AT1G32960	AT1G32970	Whole Root
AT1G01730	AT1G01740	Whole Root
AT3G09050	AT3G09060	Whole Root
AT5G67100	AT5G67110	Whole Root
AT1G13930	AT1G13940	Whole Root
AT3G62190	AT3G62200	Whole Root
AT1G16370	AT1G16380	Whole Root
AT3G14395	AT3G14400	Whole Root
AT1G18740	AT1G18745	Whole Root
AT4G28280	AT4G28290	Whole Root
AT4G24570	AT4G24580	Whole Root
AT4G11070	AT4G11080	Whole Root
AT3G23540	AT3G23550	Whole Root
AT5G59190	AT5G59200	Whole Root
AT1G21340	AT1G21350	Whole Root
AT2G40030	AT2G40050	Whole Root
AT2G31090	AT2G31100	Whole Root
AT4G23840	AT4G23850	Whole Root
AT5G52580	AT5G52600	Whole Root
AT2G29430	AT2G29440	Whole Root
AT5G12130	AT5G12140	Whole Root
AT3G62410	AT3G62420	Whole Root
AT5G21930	AT5G21940	Whole Root
AT2G23200	AT2G23210	Whole Root
AT4G03490	AT4G03500	Whole Root
AT4G22930	AT4G22940	Whole Root
AT1G15160	AT1G15165	Whole Root
AT3G15730	AT3G15740	Whole Root
AT4G23270	AT4G23271	Whole Root
AT1G07250	AT1G07260	Whole Root
AT5G53380	AT5G53390	Whole Root
AT3G22900	AT3G22910	Whole Root
AT3G56250	AT3G56260	Whole Root
AT1G15190	AT1G15200	Whole Root
AT1G10160	AT1G10170	Whole Root
AT4G01533	AT4G01535	Whole Root
AT3G61410	AT3G61415	Whole Root
AT4G38080	AT4G38090	Whole Root
AT2G18700	AT2G18710	Whole Root
AT5G02060	AT5G02070	Whole Root
AT1G15260	AT1G15270	Whole Root
AT4G13320	AT4G13330	Whole Root
AT5G05160	AT5G05170	Whole Root
AT4G20420	AT4G20430	Whole Root
AT1G42980	AT1G42990	Whole Root
AT1G74160	AT1G74170	Whole Root
AT4G16480	AT4G16490	Whole Root
AT5G05070	AT5G05080	Whole Root
AT3G18910	AT3G18930	Whole Root
AT3G57130	AT3G57140	Whole Root
AT3G06820	AT3G06830	Whole Root
AT5G56170	AT5G56180	Whole Root
AT5G20250	AT5G20260	Whole Root
AT4G13870	AT4G13880	Whole Root
AT3G16060	AT3G16070	Whole Root
AT2G47090	AT2G47110	Whole Root
AT1G52780	AT1G52790	Whole Root
AT2G28440	AT2G28450	Whole Root
AT1G17500	AT1G17510	Whole Root
AT4G02970	AT4G02980	Whole Root
AT1G06240	AT1G06250	Whole Root
AT5G22810	AT5G22820	Whole Root
AT5G52280	AT5G52290	Whole Root
AT5G17830	AT5G17840	Whole Root
AT4G29870	AT4G29880	Whole Root
AT3G57620	AT3G57630	Whole Root
AT5G19400	AT5G19410	Whole Root
AT5G13280	AT5G13290	Whole Root
AT1G73190	AT1G73200	Whole Root
AT2G17830	AT2G17840	Whole Root
AT2G46020	AT2G46030	Whole Root
AT2G30690	AT2G30695	Whole Root
AT3G24929	AT3G24982	Whole Root
AT3G51540	AT3G51550	Whole Root
AT1G03990	AT1G04000	Whole Root
AT4G37710	AT4G37720	Whole Root
AT5G49060	AT5G49070	Whole Root
AT3G52080	AT3G52090	Whole Root
AT5G04660	AT5G04670	Whole Root
AT3G19240	AT3G19250	Whole Root
AT2G33060	AT2G33070	Whole Root
AT5G10600	AT5G10605	Whole Root
AT3G05310	AT3G05320	Whole Root
AT5G10340	AT5G10350	Whole Root
AT5G66030	AT5G66040	Whole Root
AT3G12810	AT3G12820	Whole Root
AT5G04720	AT5G04730	Whole Root
AT3G02380	AT3G02390	Whole Root
AT1G26700	AT1G26710	Whole Root
AT1G71740	AT1G71750	Whole Root
AT1G72710	AT1G72720	Whole Root
AT4G32810	AT4G32820	Whole Root
AT1G70100	AT1G70110	Whole Root
AT1G34420	AT1G34430	Whole Root
AT1G71110	AT1G71120	Whole Root
AT5G64030	AT5G64040	Whole Root
AT5G01670	AT5G01680	Whole Root
AT3G10820	AT3G10840	Whole Root
AT3G18480	AT3G18485	Whole Root
AT3G52250	AT3G52260	Whole Root
AT3G17920	AT3G17930	Whole Root
AT1G16000	AT1G16010	Whole Root
AT1G05510	AT1G05520	Whole Root
AT1G77370	AT1G77380	Whole Root
AT1G16250	AT1G16260	Whole Root
AT5G55530	AT5G55540	Whole Root
AT2G43480	AT2G43490	Whole Root
AT1G07850	AT1G07870	Whole Root
AT2G31820	AT2G31830	Whole Root
AT2G40850	AT2G40860	Whole Root
AT4G37690	AT4G37700	Whole Root
AT1G34100	AT1G34110	Whole Root
AT3G03360	AT3G03370	Whole Root
AT2G46735	AT2G46740	Whole Root
AT4G19210	AT4G19220	Whole Root
AT1G33612	AT1G33615	Whole Root
AT2G24960	AT2G24970	Whole Root
AT1G35720	AT1G35730	Whole Root
AT2G40580	AT2G40590	Whole Root
AT1G79950	AT1G79960	Whole Root
AT4G25860	AT4G25870	Whole Root
AT4G38590	AT4G38600	Whole Root
AT5G64270	AT5G64280	Whole Root
AT1G14190	AT1G14200	Whole Root
AT2G22870	AT2G22880	Whole Root
AT5G02150	AT5G02160	Whole Root
AT1G68862	AT1G68870	Whole Root
AT1G48598	AT1G48605	Whole Root
AT1G75261	AT1G75270	Whole Root
AT4G31740	AT4G31750	Whole Root
AT5G42290	AT5G42300	Whole Root
AT3G05630	AT3G05640	Whole Root
AT5G14160	AT5G14170	Whole Root
AT4G32830	AT4G32840	Whole Root
AT3G62970	AT3G62980	Whole Root
AT1G30620	AT1G30630	Whole Root
AT5G13580	AT5G13590	Whole Root
AT3G59500	AT3G59510	Whole Root
AT4G23000	AT4G23010	Whole Root
AT1G51620	AT1G51630	Whole Root
AT2G37690	AT2G37700	Whole Root
AT1G54490	AT1G54500	Whole Root
AT2G41820	AT2G41830	Whole Root
AT1G73885	AT1G73890	Whole Root
AT1G17200	AT1G17210	Whole Root
AT3G04630	AT3G04640	Whole Root
AT5G65510	AT5G65520	Whole Root
AT1G52820	AT1G52825	Whole Root
AT4G22520	AT4G22530	Whole Root
AT4G29580	AT4G29590	Whole Root
AT4G14890	AT4G14900	Whole Root
AT1G26260	AT1G26270	Whole Root
AT2G16390	AT2G16400	Whole Root
AT3G16460	AT3G16470	Whole Root
AT4G36540	AT4G36550	Whole Root
AT2G40160	AT2G40170	Whole Root
AT1G27000	AT1G27008	Whole Root
AT5G06930	AT5G06940	Whole Root
AT1G15570	AT1G15580	Whole Root
AT1G71400	AT1G71410	Whole Root
AT1G05630	AT1G05640	Whole Root
AT1G22660	AT1G22670	Whole Root
AT1G30455	AT1G30460	Whole Root
AT4G39400	AT4G39403	Whole Root
AT4G39220	AT4G39230	Whole Root
AT5G05410	AT5G05420	Whole Root
AT1G24159	AT1G24160	Whole Root
AT2G34440	AT2G34450	Whole Root
AT5G41910	AT5G41920	Whole Root
AT5G60170	AT5G60180	Whole Root
AT5G03300	AT5G03310	Whole Root
AT1G53190	AT1G53200	Whole Root
AT2G46570	AT2G46580	Whole Root
AT2G01110	AT2G01120	Whole Root
AT5G17500	AT5G17510	Whole Root
AT1G11060	AT1G11070	Whole Root
AT2G28160	AT2G28170	Whole Root
AT5G46090	AT5G46100	Whole Root
AT5G40850	AT5G40855	Whole Root
AT1G68050	AT1G68060	Whole Root
AT5G21280	AT5G21970	Whole Root
AT5G15710	AT5G15720	Whole Root
AT5G59070	AT5G59080	Whole Root
AT3G51480	AT3G51490	Whole Root
AT4G19450	AT4G19452	Whole Root
AT3G10800	AT3G10810	Whole Root
AT5G18140	AT5G18150	Whole Root
AT5G62040	AT5G62050	Whole Root
AT5G08480	AT5G08490	Whole Root
AT1G15125	AT1G15130	Whole Root
AT2G17690	AT2G17695	Whole Root
AT5G42480	AT5G42490	Whole Root
AT5G56720	AT5G56730	Whole Root
AT5G10510	AT5G10520	Whole Root
AT2G18770	AT2G18780	Whole Root
AT1G72870	AT1G72880	Whole Root
ATMG01390	ATMG01400	Whole Root
AT3G14140	AT3G14150	Whole Root
AT2G15970	AT2G15980	Whole Root
AT1G17970	AT1G17980	Whole Root
AT1G76070	AT1G76080	Whole Root
AT5G19520	AT5G19530	Whole Root
AT1G09310	AT1G09320	Whole Root
AT5G01760	AT5G01770	Whole Root
AT1G79890	AT1G79900	Whole Root
AT3G16710	AT3G16712	Whole Root
AT5G39350	AT5G39360	Whole Root
AT4G18465	AT4G18480	Whole Root
AT4G29350	AT4G29360	Whole Root
AT3G22780	AT3G22790	Whole Root
AT4G03220	AT4G03230	Whole Root
AT5G11170	AT5G11180	Whole Root
AT1G71520	AT1G71528	Whole Root
AT2G42950	AT2G42955	Whole Root
AT1G05330	AT1G05340	Whole Root
AT1G77270	AT1G77280	Whole Root
AT1G11300	AT1G11310	Whole Root
AT1G78890	AT1G78895	Whole Root
AT1G09900	AT1G09910	Whole Root
AT1G49400	AT1G49405	Whole Root
AT4G38650	AT4G38660	Whole Root
AT2G01750	AT2G01755	Whole Root
AT3G17670	AT3G17680	Whole Root
AT2G47010	AT2G47020	Whole Root
AT1G62020	AT1G62030	Whole Root
AT4G01150	AT4G01160	Whole Root
AT5G23590	AT5G23600	Whole Root
AT2G20940	AT2G20950	Whole Root
AT3G48070	AT3G48080	Whole Root
AT3G09430	AT3G09440	Whole Root
AT3G52155	AT3G52160	Whole Root
AT3G06895	AT3G06910	Whole Root
AT2G32580	AT2G32590	Whole Root
AT2G46200	AT2G46210	Whole Root
AT1G77570	AT1G77580	Whole Root
AT5G21050	AT5G21060	Whole Root
AT1G52620	AT1G52630	Whole Root
AT2G13680	AT2G13690	Whole Root
AT4G21550	AT4G21560	Whole Root
AT4G31180	AT4G31190	Whole Root
AT4G15030	AT4G15040	Whole Root
AT1G71010	AT1G71015	Whole Root
AT1G17540	AT1G17545	Whole Root
AT1G19968	AT1G19970	Whole Root
AT5G27650	AT5G27660	Whole Root
AT3G46668	AT3G46680	Whole Root
AT1G70480	AT1G70490	Whole Root
AT2G34660	AT2G34670	Whole Root
AT1G21695	AT1G21700	Whole Root
AT2G43890	AT2G43900	Whole Root
AT3G10400	AT3G10405	Whole Root
AT5G16730	AT5G16740	Whole Root
AT1G18130	AT1G18140	Whole Root
AT5G47880	AT5G47890	Whole Root
AT1G64130	AT1G64140	Whole Root
AT4G31360	AT4G31370	Whole Root
AT2G34870	AT2G34880	Whole Root
AT1G10810	AT1G10820	Whole Root
AT1G53541	AT1G53542	Whole Root
AT1G70060	AT1G70070	Whole Root
AT4G05020	AT4G05030	Whole Root
AT3G59790	AT3G59800	Whole Root
AT1G10455	AT1G10460	Whole Root
AT5G53520	AT5G53530	Whole Root
AT4G25560	AT4G25570	Whole Root
AT2G26135	AT2G26140	Whole Root
AT3G24590	AT3G24600	Whole Root
AT4G38390	AT4G38400	Whole Root
AT1G78600	AT1G78610	Whole Root
AT1G25380	AT1G25390	Whole Root
AT1G68725	AT1G68730	Whole Root
AT4G33620	AT4G33625	Whole Root
AT1G68390	AT1G68400	Whole Root
AT4G14500	AT4G14510	Whole Root
AT1G72360	AT1G72370	Whole Root
AT1G28250	AT1G28260	Whole Root
AT2G44430	AT2G44440	Whole Root
AT2G46050	AT2G46060	Whole Root
AT4G24900	AT4G24910	Whole Root
AT2G35140	AT2G35150	Whole Root
AT3G02720	AT3G02730	Whole Root
AT3G25400	AT3G25410	Whole Root
AT5G11200	AT5G11210	Whole Root
AT5G01980	AT5G01990	Whole Root
AT4G34000	AT4G34020	Whole Root
AT3G07790	AT3G07800	Whole Root
AT5G17450	AT5G17460	Whole Root
AT2G02955	AT2G02960	Whole Root
AT1G08620	AT1G08630	Whole Root
AT1G21450	AT1G21460	Whole Root
AT3G12990	AT3G13000	Whole Root
AT1G23880	AT1G23890	Whole Root
AT4G18830	AT4G18840	Whole Root
AT3G10180	AT3G10185	Whole Root
AT4G16900	AT4G16915	Whole Root
AT4G29790	AT4G29800	Whole Root
AT4G37130	AT4G37140	Whole Root
AT4G35970	AT4G35980	Whole Root
AT4G27470	AT4G27480	Whole Root
AT5G65180	AT5G65200	Whole Root
AT5G15760	AT5G15770	Whole Root
AT3G13850	AT3G13860	Whole Root
AT3G10500	AT3G10510	Whole Root
AT5G07720	AT5G07730	Whole Root
AT2G20920	AT2G20921	Whole Root
AT1G60190	AT1G60200	Whole Root
AT1G74055	AT1G74060	Whole Root
AT3G48140	AT3G48150	Whole Root
AT1G33340	AT1G33350	Whole Root
AT3G03510	AT3G03520	Whole Root
AT1G64210	AT1G64220	Whole Root
AT3G61800	AT3G61810	Whole Root
AT1G06680	AT1G06690	Whole Root
AT4G29070	AT4G29080	Whole Root
AT5G08760	AT5G08770	Whole Root
AT3G48810	AT3G48820	Whole Root
AT3G13900	AT3G13910	Whole Root
AT5G08090	AT5G08100	Whole Root
AT2G13600	AT2G13610	Whole Root
AT3G57910	AT3G57920	Whole Root
AT3G57450	AT3G57460	Whole Root
AT1G03540	AT1G03550	Whole Root
AT1G69350	AT1G69360	Whole Root
AT5G10790	AT5G10800	Whole Root
AT3G10845	AT3G10850	Whole Root
AT2G42975	AT2G42980	Whole Root
AT1G74380	AT1G74390	Whole Root
AT4G26710	AT4G26720	Whole Root
AT2G29710	AT2G29720	Whole Root
AT4G13390	AT4G13395	Whole Root
AT2G31290	AT2G31300	Whole Root
AT2G37560	AT2G37570	Whole Root
AT2G32280	AT2G32290	Whole Root
AT1G73920	AT1G73930	Whole Root
AT3G07550	AT3G07560	Whole Root
AT5G12970	AT5G12980	Whole Root
AT4G16110	AT4G16120	Whole Root
AT1G31910	AT1G31920	Whole Root
AT1G09410	AT1G09415	Whole Root
AT5G66070	AT5G66080	Whole Root
AT2G48130	AT2G48140	Whole Root
AT4G33600	AT4G33610	Whole Root
AT2G47820	AT2G47830	Whole Root
AT1G28680	AT1G28690	Whole Root
AT1G65840	AT1G65845	Whole Root
AT5G14090	AT5G14100	Whole Root
AT3G44180	AT3G44190	Whole Root
ATCG01040	ATCG01050	Whole Root
AT2G24681	AT2G24683	Whole Root
AT2G34260	AT2G34270	Whole Root
AT2G16630	AT2G16640	Whole Root
AT5G34930	AT5G34940	Whole Root
AT2G31910	AT2G31920	Whole Root
AT5G21070	AT5G21080	Whole Root
AT2G07681	AT2G07682	Whole Root
AT5G28900	AT5G28910	Whole Root
AT1G17470	AT1G17480	Whole Root
AT4G01990	AT4G01995	Whole Root
AT3G20280	AT3G20290	Whole Root
AT4G11330	AT4G11340	Whole Root
AT2G25560	AT2G25565	Whole Root
AT5G20020	AT5G20030	Whole Root
AT2G01710	AT2G01720	Whole Root
AT2G47920	AT2G47930	Whole Root
AT1G10030	AT1G10040	Whole Root
AT2G42990	AT2G43000	Whole Root
AT5G67385	AT5G67390	Whole Root
AT4G11690	AT4G11700	Whole Root
AT2G03380	AT2G03390	Whole Root
AT4G03410	AT4G03415	Whole Root
AT4G38340	AT4G38350	Whole Root
AT4G37480	AT4G37490	Whole Root
AT4G20890	AT4G20900	Whole Root
AT1G23010	AT1G23020	Whole Root
AT2G32640	AT2G32650	Whole Root
AT1G29380	AT1G29390	Whole Root
AT4G25250	AT4G25260	Whole Root
AT4G14520	AT4G14530	Whole Root
ATCG00650	ATCG00660	Whole Root
AT3G19220	AT3G19230	Whole Root
AT4G31805	AT4G31810	Whole Root
AT1G68020	AT1G68030	Whole Root
AT4G33060	AT4G33070	Whole Root
AT5G45430	AT5G45440	Whole Root
AT4G14280	AT4G14290	Whole Root
AT5G46030	AT5G46040	Whole Root
AT1G07705	AT1G07710	Whole Root
AT4G10640	AT4G10650	Whole Root
AT2G39190	AT2G39200	Whole Root
AT5G10605	AT5G10610	Whole Root
AT5G10050	AT5G10060	Whole Root
AT1G61520	AT1G61665	Whole Root
AT4G19080	AT4G19090	Whole Root
AT2G17140	AT2G17150	Whole Root
AT5G18650	AT5G18660	Whole Root
AT5G09220	AT5G09225	Whole Root
AT1G32850	AT1G32860	Whole Root
AT5G18890	AT5G18900	Whole Root
AT1G09070	AT1G09080	Whole Root
AT1G78300	AT1G78310	Whole Root
AT1G16060	AT1G16070	Whole Root
AT5G14360	AT5G14370	Whole Root
AT2G33570	AT2G33580	Whole Root
AT2G42720	AT2G42730	Whole Root
AT5G02080	AT5G02090	Whole Root
AT3G01890	AT3G01900	Whole Root
AT3G09370	AT3G09375	Whole Root
AT4G39270	AT4G39280	Whole Root
AT1G79400	AT1G79410	Whole Root
AT2G45310	AT2G45320	Whole Root
AT5G61030	AT5G61040	Whole Root
AT2G07697	AT2G07798	Whole Root
AT1G78500	AT1G78510	Whole Root
AT1G14390	AT1G14400	Whole Root
AT4G14180	AT4G14190	Whole Root
AT5G48620	AT5G48630	Whole Root
AT3G61700	AT3G61710	Whole Root
AT1G73340	AT1G73350	Whole Root
AT5G07640	AT5G07650	Whole Root
AT4G30130	AT4G30140	Whole Root
AT1G11410	AT1G11420	Whole Root
AT5G48920	AT5G48930	Whole Root
AT3G15430	AT3G15440	Whole Root
AT2G17440	AT2G17442	Whole Root
AT3G60286	AT3G60290	Whole Root
AT3G15110	AT3G15111	Whole Root
AT5G40440	AT5G40450	Whole Root
AT1G77290	AT1G77300	Whole Root
AT2G42620	AT2G42640	Whole Root
AT4G13290	AT4G13300	Whole Root
AT1G45229	AT1G45233	Whole Root
AT1G63300	AT1G63310	Whole Root
AT1G33770	AT1G33780	Whole Root
AT5G24460	AT5G24470	Whole Root
AT1G09560	AT1G09570	Whole Root
AT3G48580	AT3G48590	Whole Root
AT1G23790	AT1G23800	Whole Root
AT3G58570	AT3G58580	Whole Root
AT3G48160	AT3G48170	Whole Root
AT2G44010	AT2G44020	Whole Root
AT4G33160	AT4G33170	Whole Root
AT1G06030	AT1G06040	Whole Root
AT3G02160	AT3G02170	Whole Root
AT4G00895	AT4G00900	Whole Root
AT5G25630	AT5G25640	Whole Root
AT5G66830	AT5G66840	Whole Root
AT5G15330	AT5G15340	Whole Root
AT5G04200	AT5G04210	Whole Root
AT1G69010	AT1G69020	Whole Root
AT2G40935	AT2G40940	Whole Root
AT1G03810	AT1G03820	Whole Root
AT4G02655	AT4G02660	Whole Root
AT5G10680	AT5G10690	Whole Root
AT2G22080	AT2G22090	Whole Root
AT4G14548	AT4G14550	Whole Root
AT2G29640	AT2G29650	Whole Root
AT1G02700	AT1G02710	Whole Root
AT1G48920	AT1G48930	Whole Root
AT4G19540	AT4G19550	Whole Root
AT4G23930	AT4G23940	Whole Root
AT5G67470	AT5G67480	Whole Root
AT1G74680	AT1G74690	Whole Root
AT3G11460	AT3G11470	Whole Root
AT1G05140	AT1G05150	Whole Root
AT1G33470	AT1G33475	Whole Root
AT3G12760	AT3G12770	Whole Root
AT4G33925	AT4G33930	Whole Root
AT1G49890	AT1G49900	Whole Root
AT3G50230	AT3G50240	Whole Root
AT3G10310	AT3G10320	Whole Root
AT5G25310	AT5G25320	Whole Root
AT5G43740	AT5G43745	Whole Root
AT5G08020	AT5G08030	Whole Root
AT1G08600	AT1G08610	Whole Root
AT2G33450	AT2G33460	Whole Root
AT3G25495	AT3G25500	Whole Root
AT3G12060	AT3G12070	Whole Root
AT1G67430	AT1G67440	Whole Root
AT4G31870	AT4G31875	Whole Root
AT3G43260	AT3G43270	Whole Root
AT3G07900	AT3G07910	Whole Root
AT3G18850	AT3G18860	Whole Root
AT2G30780	AT2G30790	Whole Root
AT2G32960	AT2G32970	Whole Root
AT5G09225	AT5G09230	Whole Root
AT1G68110	AT1G68120	Whole Root
AT1G72660	AT1G72670	Whole Root
AT3G50910	AT3G50920	Whole Root
AT3G42660	AT3G42670	Whole Root
AT5G52170	AT5G52180	Whole Root
AT3G16980	AT3G16990	Whole Root
AT5G58375	AT5G58380	Whole Root
AT5G56870	AT5G56880	Whole Root
AT3G23480	AT3G23490	Whole Root
AT5G03545	AT5G03550	Whole Root
AT5G10750	AT5G10760	Whole Root
AT1G02010	AT1G02020	Whole Root
AT2G04350	AT2G04360	Whole Root
AT3G14410	AT3G14415	Whole Root
AT3G12360	AT3G12370	Whole Root
AT1G53270	AT1G53280	Whole Root
AT4G16710	AT4G16720	Whole Root
AT1G77530	AT1G77540	Whole Root
AT2G42750	AT2G42760	Whole Root
AT1G03770	AT1G03780	Whole Root
AT2G01735	AT2G01740	Whole Root
ATCG00690	ATCG00700	Whole Root
AT2G26340	AT2G26350	Whole Root
AT2G45440	AT2G45450	Whole Root
AT2G21550	AT2G21560	Whole Root
AT1G29520	AT1G29530	Whole Root
AT1G14270	AT1G14280	Whole Root
AT4G03120	AT4G03130	Whole Root
AT3G14580	AT3G14590	Whole Root
AT2G44735	AT2G44740	Whole Root
AT1G80940	AT1G80950	Whole Root
AT2G27505	AT2G27510	Whole Root
AT3G22945	AT3G22950	Whole Root
AT2G41750	AT2G41760	Whole Root
AT3G12080	AT3G12090	Whole Root
AT4G21700	AT4G21705	Whole Root
AT2G02760	AT2G02770	Whole Root
AT4G13860	AT4G13870	Whole Root
AT1G20640	AT1G20650	Whole Root
AT3G01280	AT3G01290	Whole Root
AT1G50740	AT1G50750	Endodermis
AT1G16370	AT1G16380	Endodermis
AT1G76630	AT1G76640	Endodermis
AT1G71740	AT1G71750	Endodermis
AT1G59860	AT1G59865	Endodermis
AT3G63300	AT3G63310	Endodermis
AT5G43050	AT5G43060	Endodermis
AT4G30100	AT4G30110	Endodermis
AT5G67100	AT5G67110	Endodermis
AT5G18960	AT5G18970	Endodermis
AT2G06045	AT2G06050	Endodermis
AT2G13550	AT2G13560	Endodermis
AT1G01730	AT1G01740	Endodermis
AT5G07870	AT5G07880	Endodermis
AT3G61410	AT3G61415	Endodermis
AT5G21930	AT5G21940	Endodermis
AT1G72710	AT1G72720	Endodermis
AT1G18740	AT1G18745	Endodermis
AT1G15160	AT1G15165	Endodermis
AT1G74160	AT1G74170	Endodermis
AT2G31090	AT2G31100	Endodermis
AT3G23540	AT3G23550	Endodermis
AT4G11070	AT4G11080	Endodermis
AT5G59190	AT5G59200	Endodermis
AT3G62190	AT3G62200	Endodermis
AT4G23270	AT4G23271	Endodermis
AT3G14395	AT3G14400	Endodermis
AT1G30755	AT1G30757	Endodermis
AT4G33600	AT4G33610	Endodermis
AT1G73190	AT1G73200	Endodermis
AT3G11810	AT3G11820	Endodermis
AT1G78600	AT1G78610	Endodermis
AT4G13320	AT4G13330	Endodermis
AT1G17970	AT1G17980	Endodermis
AT2G23200	AT2G23210	Endodermis
AT1G15190	AT1G15200	Endodermis
AT4G24570	AT4G24580	Endodermis
AT5G52580	AT5G52600	Endodermis
AT3G09050	AT3G09060	Endodermis
AT3G50230	AT3G50240	Endodermis
AT4G03490	AT4G03500	Endodermis
AT5G20250	AT5G20260	Endodermis
AT5G07610	AT5G07620	Endodermis
AT5G05160	AT5G05170	Endodermis
AT4G01533	AT4G01535	Endodermis
AT1G13930	AT1G13940	Endodermis
AT5G05070	AT5G05080	Endodermis
AT5G06930	AT5G06940	Endodermis
AT5G19400	AT5G19410	Endodermis
AT3G24715	AT3G24730	Endodermis
AT3G57130	AT3G57140	Endodermis
AT5G18140	AT5G18150	Endodermis
AT5G40440	AT5G40450	Endodermis
AT3G06820	AT3G06830	Endodermis
AT3G10820	AT3G10840	Endodermis
AT3G05310	AT3G05320	Endodermis
AT3G16060	AT3G16070	Endodermis
AT2G24960	AT2G24970	Endodermis
AT3G52250	AT3G52260	Endodermis
AT4G23840	AT4G23850	Endodermis
AT1G17500	AT1G17510	Endodermis
AT3G15730	AT3G15740	Endodermis
AT4G03610	AT4G03620	Endodermis
AT4G16480	AT4G16490	Endodermis
AT3G24929	AT3G24982	Endodermis
AT4G20420	AT4G20430	Endodermis
AT1G48598	AT1G48605	Endodermis
AT3G62410	AT3G62420	Endodermis
AT1G16000	AT1G16010	Endodermis
AT2G47010	AT2G47020	Endodermis
AT1G05510	AT1G05520	Endodermis
AT3G56250	AT3G56260	Endodermis
AT1G35720	AT1G35730	Endodermis
AT2G40030	AT2G40050	Endodermis
AT1G14190	AT1G14200	Endodermis
AT1G10160	AT1G10170	Endodermis
AT1G07250	AT1G07260	Endodermis
AT5G52280	AT5G52290	Endodermis
AT5G10340	AT5G10350	Endodermis
AT2G33060	AT2G33070	Endodermis
AT3G12760	AT3G12770	Endodermis
AT3G57910	AT3G57920	Endodermis
AT1G03990	AT1G04000	Endodermis
AT3G02380	AT3G02390	Endodermis
AT2G46020	AT2G46030	Endodermis
AT1G06240	AT1G06250	Endodermis
AT3G12810	AT3G12820	Endodermis
AT1G42980	AT1G42990	Endodermis
AT5G42480	AT5G42490	Endodermis
AT2G40850	AT2G40860	Endodermis
AT3G18910	AT3G18930	Endodermis
AT1G79950	AT1G79960	Endodermis
AT4G13870	AT4G13880	Endodermis
AT1G52820	AT1G52825	Endodermis
AT3G51540	AT3G51550	Endodermis
AT1G52620	AT1G52630	Endodermis
AT1G17200	AT1G17210	Endodermis
AT5G05410	AT5G05420	Endodermis
AT4G38080	AT4G38090	Endodermis
AT5G42290	AT5G42300	Endodermis
AT2G22870	AT2G22880	Endodermis
AT2G47090	AT2G47110	Endodermis
AT4G38590	AT4G38600	Endodermis
AT1G34420	AT1G34430	Endodermis
AT2G46050	AT2G46060	Endodermis
AT2G48020	AT2G48030	Endodermis
AT4G00895	AT4G00900	Endodermis
AT1G07850	AT1G07870	Endodermis
AT2G15970	AT2G15980	Endodermis
AT1G32440	AT1G32450	Endodermis
AT4G02970	AT4G02980	Endodermis
AT5G25630	AT5G25640	Endodermis
AT3G19240	AT3G19250	Endodermis
AT5G56170	AT5G56180	Endodermis
AT1G68020	AT1G68030	Endodermis
AT4G27470	AT4G27480	Endodermis
AT4G14500	AT4G14510	Endodermis
AT2G32580	AT2G32590	Endodermis
AT5G22810	AT5G22820	Endodermis
AT1G09900	AT1G09910	Endodermis
AT2G34660	AT2G34670	Endodermis
AT4G18465	AT4G18480	Endodermis
AT2G18700	AT2G18710	Endodermis
AT5G66030	AT5G66040	Endodermis
AT5G36000	AT5G36002	Endodermis
AT5G04660	AT5G04670	Endodermis
AT2G40580	AT2G40590	Endodermis
AT4G19210	AT4G19220	Endodermis
AT1G34100	AT1G34110	Endodermis
AT3G03360	AT3G03370	Endodermis
AT5G16730	AT5G16740	Endodermis
AT2G44160	AT2G44170	Endodermis
AT1G30620	AT1G30630	Endodermis
AT3G18480	AT3G18485	Endodermis
AT5G20020	AT5G20030	Endodermis
AT4G39270	AT4G39280	Endodermis
AT5G46090	AT5G46100	Endodermis
AT1G75261	AT1G75270	Endodermis
AT4G39400	AT4G39403	Endodermis
AT5G06820	AT5G06830	Endodermis
AT5G64030	AT5G64040	Endodermis
AT1G15260	AT1G15270	Endodermis
AT3G09370	AT3G09375	Endodermis
AT4G37690	AT4G37700	Endodermis
AT1G51620	AT1G51630	Endodermis
AT1G17600	AT1G17610	Endodermis
AT3G16710	AT3G16712	Endodermis
AT5G56870	AT5G56880	Endodermis
AT1G11300	AT1G11310	Endodermis
AT3G52080	AT3G52090	Endodermis
AT1G52780	AT1G52790	Endodermis
AT5G03300	AT5G03310	Endodermis
AT3G29010	AT3G29020	Endodermis
AT3G55605	AT3G55610	Endodermis
AT4G14890	AT4G14900	Endodermis
AT2G20940	AT2G20950	Endodermis
AT2G29430	AT2G29440	Endodermis
AT2G28440	AT2G28450	Endodermis
AT5G11200	AT5G11210	Endodermis
AT3G10800	AT3G10810	Endodermis
AT1G68050	AT1G68060	Endodermis
AT1G27080	AT1G27090	Endodermis
AT1G19770	AT1G19780	Endodermis
AT1G79890	AT1G79900	Endodermis
AT1G18300	AT1G18310	Endodermis
AT1G15125	AT1G15130	Endodermis
AT5G23590	AT5G23600	Endodermis
AT5G64270	AT5G64280	Endodermis
AT4G28280	AT4G28290	Endodermis
AT4G29870	AT4G29880	Endodermis
AT5G18500	AT5G18510	Endodermis
AT3G51480	AT3G51490	Endodermis
AT3G10310	AT3G10320	Endodermis
AT1G68862	AT1G68870	Endodermis
AT3G57072	AT3G57080	Endodermis
AT3G07790	AT3G07800	Endodermis
AT5G60170	AT5G60180	Endodermis
AT4G32810	AT4G32820	Endodermis
AT2G40980	AT2G40990	Endodermis
AT1G08600	AT1G08610	Endodermis
AT1G54490	AT1G54500	Endodermis
AT5G46030	AT5G46040	Endodermis
AT3G17920	AT3G17930	Endodermis
AT4G34000	AT4G34020	Endodermis
AT1G70100	AT1G70110	Endodermis
ATMG01390	ATMG01400	Endodermis
AT4G37710	AT4G37720	Endodermis
AT5G48920	AT5G48930	Endodermis
AT3G07005	AT3G07010	Endodermis
AT1G70480	AT1G70490	Endodermis
AT2G31910	AT2G31920	Endodermis
AT2G34260	AT2G34270	Endodermis
AT5G12130	AT5G12140	Endodermis
AT4G14280	AT4G14290	Endodermis
AT1G77370	AT1G77380	Endodermis
AT1G10810	AT1G10820	Endodermis
AT2G41820	AT2G41830	Endodermis
AT3G13900	AT3G13910	Endodermis
AT5G08480	AT5G08490	Endodermis
AT3G03510	AT3G03520	Endodermis
AT2G34440	AT2G34450	Endodermis
AT4G01150	AT4G01160	Endodermis
AT2G45310	AT2G45320	Endodermis
AT3G50100	AT3G50110	Endodermis
AT3G48070	AT3G48080	Endodermis
AT3G09863	AT3G09870	Endodermis
AT5G52170	AT5G52180	Endodermis
AT2G38690	AT2G38695	Endodermis
AT5G04720	AT5G04730	Endodermis
AT5G56720	AT5G56730	Endodermis
AT3G02010	AT3G02020	Endodermis
ATCG01040	ATCG01050	Endodermis
AT2G21270	AT2G21280	Endodermis
AT1G08620	AT1G08630	Endodermis
AT5G19520	AT5G19530	Endodermis
AT1G15175	AT1G15180	Endodermis
AT1G53541	AT1G53542	Endodermis
AT2G46320	AT2G46330	Endodermis
AT5G55530	AT5G55540	Endodermis
AT1G53190	AT1G53200	Endodermis
AT3G24590	AT3G24600	Endodermis
AT4G31740	AT4G31750	Endodermis
AT2G18770	AT2G18780	Endodermis
AT1G71110	AT1G71120	Endodermis
AT2G42975	AT2G42980	Endodermis
AT3G48140	AT3G48150	Endodermis
AT1G53550	AT1G53560	Endodermis
AT1G16250	AT1G16260	Endodermis
AT2G28220	AT2G28230	Endodermis
AT5G03490	AT5G03495	Endodermis
AT5G02060	AT5G02070	Endodermis
AT5G49060	AT5G49070	Endodermis
AT3G14580	AT3G14590	Endodermis
AT1G14390	AT1G14400	Endodermis
AT3G27090	AT3G27095	Endodermis
AT5G17450	AT5G17460	Endodermis
AT1G78890	AT1G78895	Endodermis
AT1G05930	AT1G05940	Endodermis
AT5G27650	AT5G27660	Endodermis
AT5G11170	AT5G11180	Endodermis
AT2G27440	AT2G27450	Endodermis
AT5G18890	AT5G18900	Endodermis
AT1G07705	AT1G07710	Endodermis
AT5G17830	AT5G17840	Endodermis
AT4G29070	AT4G29080	Endodermis
AT1G27000	AT1G27008	Endodermis
AT3G57620	AT3G57630	Endodermis
AT4G27590	AT4G27595	Endodermis
AT5G01260	AT5G01270	Endodermis
AT2G47820	AT2G47830	Endodermis
AT5G07720	AT5G07730	Endodermis
AT1G26260	AT1G26270	Endodermis
AT2G25880	AT2G25890	Endodermis
AT4G05049	AT4G05050	Endodermis
AT2G30690	AT2G30695	Endodermis
AT1G28680	AT1G28690	Endodermis
AT3G52155	AT3G52160	Endodermis
AT4G34810	AT4G34830	Endodermis
AT5G65274	AT5G65280	Endodermis
AT4G11000	AT4G11010	Endodermis
AT1G79270	AT1G79280	Endodermis
AT1G72660	AT1G72670	Endodermis
AT4G15030	AT4G15040	Endodermis
AT4G22520	AT4G22530	Endodermis
AT3G13580	AT3G13590	Endodermis
AT5G42980	AT5G42990	Endodermis
AT1G80940	AT1G80950	Endodermis
AT1G06030	AT1G06040	Endodermis
AT1G72360	AT1G72370	Endodermis
AT2G31970	AT2G31980	Endodermis
AT1G72870	AT1G72880	Endodermis
AT1G49400	AT1G49405	Endodermis
AT2G33160	AT2G33170	Endodermis
AT2G46200	AT2G46210	Endodermis
AT3G07550	AT3G07560	Endodermis
AT1G02500	AT1G02510	Endodermis
AT3G09570	AT3G09580	Endodermis
AT1G10455	AT1G10460	Endodermis
AT3G02160	AT3G02170	Endodermis
AT1G79400	AT1G79410	Endodermis
AT2G47920	AT2G47930	Endodermis
AT5G13580	AT5G13590	Endodermis
AT5G66590	AT5G66600	Endodermis
AT1G74870	AT1G74875	Endodermis
AT4G31360	AT4G31370	Endodermis
AT5G13280	AT5G13290	Endodermis
AT5G60320	AT5G60330	Endodermis
AT2G47420	AT2G47430	Endodermis
AT5G62040	AT5G62050	Endodermis
AT1G06420	AT1G06430	Endodermis
AT2G23970	AT2G23980	Endodermis
AT5G45430	AT5G45440	Endodermis
AT2G34870	AT2G34880	Endodermis
AT1G05140	AT1G05150	Endodermis
AT5G66070	AT5G66080	Endodermis
AT5G25520	AT5G25530	Endodermis
AT5G40850	AT5G40855	Endodermis
AT3G04890	AT3G04900	Endodermis
AT1G74055	AT1G74060	Endodermis
AT5G37250	AT5G37260	Endodermis
AT3G62970	AT3G62980	Endodermis
AT5G01980	AT5G01990	Endodermis
AT5G28900	AT5G28910	Endodermis
AT1G23880	AT1G23890	Endodermis
AT4G33620	AT4G33625	Endodermis
AT1G48920	AT1G48930	Endodermis
AT4G39220	AT4G39230	Endodermis
AT4G22930	AT4G22940	Endodermis
AT2G15270	AT2G15271	Endodermis
AT4G23470	AT4G23490	Endodermis
AT2G29900	AT2G29910	Endodermis
AT1G15510	AT1G15520	Endodermis
AT2G23808	AT2G23810	Endodermis
AT1G80470	AT1G80480	Endodermis
AT4G33925	AT4G33930	Endodermis
AT3G11020	AT3G11030	Endodermis
AT4G24900	AT4G24910	Endodermis
AT1G09870	AT1G09880	Endodermis
AT2G32640	AT2G32650	Endodermis
AT2G29380	AT2G29390	Endodermis
AT5G53520	AT5G53530	Endodermis
AT5G14090	AT5G14100	Endodermis
AT3G04630	AT3G04640	Endodermis
AT1G11060	AT1G11070	Endodermis
AT1G55325	AT1G55330	Endodermis
AT1G75360	AT1G75370	Endodermis
AT5G39350	AT5G39360	Endodermis
AT2G02760	AT2G02770	Endodermis
AT3G57450	AT3G57460	Endodermis
AT5G14310	AT5G14320	Endodermis
AT2G04610	AT2G04620	Endodermis
AT5G13230	AT5G13240	Endodermis
AT1G09310	AT1G09320	Endodermis
AT1G13110	AT1G13120	Endodermis
AT2G03230	AT2G03240	Endodermis
AT2G40935	AT2G40940	Endodermis
AT1G42550	AT1G42560	Endodermis
ATMG00400	ATMG00410	Endodermis
AT3G06895	AT3G06910	Endodermis
AT4G38880	AT4G38890	Endodermis
AT4G19080	AT4G19090	Endodermis
AT3G04660	AT3G04670	Endodermis
AT2G13600	AT2G13610	Endodermis
AT1G77570	AT1G77580	Endodermis
AT2G29710	AT2G29720	Endodermis
AT5G12970	AT5G12980	Endodermis
AT4G25560	AT4G25570	Endodermis
AT1G80310	AT1G80325	Endodermis
AT4G31985	AT4G31990	Endodermis
AT3G28611	AT3G28620	Endodermis
AT3G14140	AT3G14150	Endodermis
AT2G05840	AT2G05845	Endodermis
AT2G46735	AT2G46740	Endodermis
AT1G11410	AT1G11420	Endodermis
AT2G07683	AT2G07772	Endodermis
AT2G17830	AT2G17840	Endodermis
AT1G68110	AT1G68120	Endodermis
AT4G19000	AT4G19003	Endodermis
AT2G20208	AT2G20210	Endodermis
AT5G15710	AT5G15720	Endodermis
AT5G64450	AT5G64460	Endodermis
AT1G71400	AT1G71410	Endodermis
AT1G55340	AT1G55350	Endodermis
AT3G28140	AT3G28150	Endodermis
AT1G73920	AT1G73930	Endodermis
AT2G38340	AT2G38350	Endodermis
AT1G74380	AT1G74390	Endodermis
AT3G48810	AT3G48820	Endodermis
AT3G46640	AT3G46650	Endodermis
AT1G64130	AT1G64140	Endodermis
AT4G03220	AT4G03230	Endodermis
AT1G26700	AT1G26710	Endodermis
AT5G61950	AT5G61960	Endodermis
AT5G57181	AT5G57190	Endodermis
AT4G09130	AT4G09140	Endodermis
AT5G65510	AT5G65520	Endodermis
AT1G66160	AT1G66170	Endodermis
AT3G02300	AT3G02310	Endodermis
AT1G03540	AT1G03550	Endodermis
ATCG00690	ATCG00700	Endodermis
AT1G32060	AT1G32070	Endodermis
AT1G61520	AT1G61665	Endodermis
AT3G14452	AT3G14460	Endodermis
AT2G36570	AT2G36571	Endodermis
AT2G03380	AT2G03390	Endodermis
AT3G23109	AT3G23120	Endodermis
AT4G25530	AT4G25540	Endodermis
AT4G00905	AT4G00910	Endodermis
AT4G04370	AT4G04375	Endodermis
AT3G19220	AT3G19230	Endodermis
AT3G09430	AT3G09440	Endodermis
AT1G03950	AT1G03960	Endodermis
AT1G54070	AT1G54080	Endodermis
AT3G27440	AT3G27450	Endodermis
AT2G29640	AT2G29650	Endodermis
AT4G14180	AT4G14190	Endodermis
AT3G27884	AT3G27886	Endodermis
AT4G02655	AT4G02660	Endodermis
AT2G31820	AT2G31830	Endodermis
AT1G72320	AT1G72330	Endodermis
AT3G22430	AT3G22436	Endodermis
AT1G24159	AT1G24160	Endodermis
AT5G08695	AT5G08710	Endodermis
AT3G04140	AT3G04150	Endodermis
AT1G16160	AT1G16170	Endodermis
AT5G21280	AT5G21970	Endodermis
AT2G14210	AT2G14220	Endodermis
AT1G04100	AT1G04110	Endodermis
AT1G76070	AT1G76080	Endodermis
AT3G24890	AT3G24900	Endodermis
AT1G06680	AT1G06690	Endodermis
AT2G01110	AT2G01120	Endodermis
ATCG00650	ATCG00660	Endodermis
AT1G74470	AT1G74480	Endodermis
AT1G49475	AT1G49480	Endodermis
AT3G48160	AT3G48170	Endodermis
AT1G04760	AT1G04770	Endodermis
AT1G69010	AT1G69020	Endodermis
AT3G10500	AT3G10510	Endodermis
AT2G45960	AT2G45970	Endodermis
AT1G67730	AT1G67740	Endodermis
AT1G56700	AT1G56710	Endodermis
AT4G04972	AT4G04980	Endodermis
AT2G31290	AT2G31300	Endodermis
AT3G25400	AT3G25410	Endodermis
AT1G26220	AT1G26230	Endodermis
AT4G36540	AT4G36550	Endodermis
AT5G21050	AT5G21060	Endodermis
AT3G22900	AT3G22910	Endodermis
AT1G21695	AT1G21700	Endodermis
AT4G15520	AT4G15530	Endodermis
AT1G31910	AT1G31920	Endodermis
AT1G29520	AT1G29530	Endodermis
AT1G28250	AT1G28260	Endodermis
AT5G27200	AT5G27210	Endodermis
AT4G02950	AT4G02960	Endodermis
AT4G16270	AT4G16280	Endodermis
AT3G19100	AT3G19120	Endodermis
AT4G13390	AT4G13395	Endodermis
AT3G01280	AT3G01290	Endodermis
AT3G10710	AT3G10720	Endodermis
AT3G16980	AT3G16990	Endodermis
AT2G25560	AT2G25565	Endodermis
AT2G39725	AT2G39730	Endodermis
AT5G51880	AT5G51890	Endodermis
AT3G05840	AT3G05850	Endodermis
AT2G19180	AT2G19190	Endodermis
AT1G20140	AT1G20150	Endodermis
AT5G14830	AT5G14840	Endodermis
AT1G25380	AT1G25390	Endodermis
AT4G05020	AT4G05030	Endodermis
AT1G33612	AT1G33615	Endodermis
AT4G38650	AT4G38660	Endodermis
AT5G23700	AT5G23710	Endodermis
AT2G16390	AT2G16400	Endodermis
AT2G19490	AT2G19500	Endodermis
AT1G77270	AT1G77280	Endodermis
AT2G17440	AT2G17442	Endodermis
AT1G15240	AT1G15250	Endodermis
AT3G06560	AT3G06570	Endodermis
AT5G41040	AT5G41050	Endodermis
AT4G18596	AT4G18600	Endodermis
AT4G35940	AT4G35950	Endodermis
AT4G21550	AT4G21560	Endodermis
AT2G44735	AT2G44740	Endodermis
AT4G37480	AT4G37490	Endodermis
AT2G13680	AT2G13690	Endodermis
AT1G73990	AT1G74000	Endodermis
AT2G05300	AT2G05310	Endodermis
AT5G08340	AT5G08350	Endodermis
AT5G18170	AT5G18180	Endodermis
AT3G46140	AT3G46150	Endodermis
AT2G04350	AT2G04360	Endodermis
AT5G45950	AT5G45960	Endodermis
AT4G35760	AT4G35770	Endodermis
AT2G07697	AT2G07798	Endodermis
AT3G61800	AT3G61810	Endodermis
AT1G50130	AT1G50140	Endodermis
AT1G73750	AT1G73760	Endodermis
AT2G33720	AT2G33730	Endodermis
AT4G35970	AT4G35980	Endodermis
AT1G15330	AT1G15340	Endodermis
AT3G02720	AT3G02730	Endodermis
AT3G53490	AT3G53500	Endodermis
AT1G21450	AT1G21460	Endodermis
AT1G03380	AT1G03390	Endodermis
AT5G48620	AT5G48630	Endodermis
AT3G13210	AT3G13220	Endodermis
AT4G21820	AT4G21830	Endodermis
AT2G32960	AT2G32970	Endodermis
AT1G29230	AT1G29240	Endodermis
AT5G09220	AT5G09225	Endodermis
AT5G58005	AT5G58010	Endodermis
AT1G19850	AT1G19860	Endodermis
AT4G03120	AT4G03130	Endodermis
AT1G10030	AT1G10040	Endodermis
AT3G14410	AT3G14415	Endodermis
AT1G32850	AT1G32860	Endodermis
AT4G10640	AT4G10650	Endodermis
AT1G09050	AT1G09060	Endodermis
AT3G05250	AT3G05260	Endodermis
AT3G53670	AT3G53680	Endodermis
AT1G15405	AT1G15410	Endodermis
AT2G44080	AT2G44090	Endodermis
AT2G02955	AT2G02960	Endodermis
AT4G36410	AT4G36420	Endodermis
AT4G29790	AT4G29800	Endodermis
AT3G23480	AT3G23490	Endodermis
AT4G13860	AT4G13870	Endodermis
AT1G01010	AT1G01020	Endodermis
AT3G58490	AT3G58500	Endodermis
AT5G23155	AT5G23160	Endodermis
AT2G42950	AT2G42955	Endodermis
AT4G14760	AT4G14770	Endodermis
AT4G15236	AT4G15240	Endodermis
AT5G61930	AT5G61940	Endodermis
AT1G30455	AT1G30460	Endodermis
AT5G53380	AT5G53390	Endodermis
AT1G04790	AT1G04800	Endodermis
AT5G22240	AT5G22250	Endodermis
AT2G37560	AT2G37570	Endodermis
AT1G62020	AT1G62030	Endodermis
AT4G26070	AT4G26080	Endodermis
AT1G15140	AT1G15150	Endodermis
AT3G42170	AT3G42180	Endodermis
AT4G37130	AT4G37140	Endodermis
AT2G24220	AT2G24230	Endodermis
AT5G41160	AT5G41170	Endodermis
AT5G08020	AT5G08030	Endodermis
AT1G79460	AT1G79470	Endodermis
AT5G47800	AT5G47810	Endodermis
AT1G67430	AT1G67440	Endodermis
AT1G05260	AT1G05270	Endodermis
AT4G33390	AT4G33400	Endodermis
AT1G54270	AT1G54280	Endodermis
AT3G20541	AT3G20550	Endodermis
AT3G44010	AT3G44020	Endodermis
AT3G45620	AT3G45630	Endodermis
AT1G17470	AT1G17480	Endodermis
AT1G67035	AT1G67040	Endodermis
AT3G05630	AT3G05640	Endodermis
AT5G54600	AT5G54610	Endodermis
AT1G05630	AT1G05640	Endodermis
AT3G47690	AT3G47700	Endodermis
AT5G46915	AT5G46920	Endodermis
AT2G33490	AT2G33500	Endodermis
AT1G64660	AT1G64670	Endodermis
AT1G09430	AT1G09440	Endodermis
AT5G15760	AT5G15770	Endodermis
AT5G12110	AT5G12120	Endodermis
AT1G03070	AT1G03080	Endodermis
AT2G26340	AT2G26350	Endodermis
AT1G50240	AT1G50250	Endodermis
AT1G19930	AT1G19940	Endodermis
AT2G41540	AT2G41550	Endodermis
AT2G22080	AT2G22090	Endodermis
AT5G38350	AT5G38360	Endodermis
AT3G12660	AT3G12670	Endodermis
AT2G42720	AT2G42730	Endodermis
AT1G02010	AT1G02020	Endodermis
AT5G14360	AT5G14370	Endodermis
AT1G70518	AT1G70520	Endodermis
AT1G22610	AT1G22620	Endodermis
AT3G22780	AT3G22790	Endodermis
AT5G18650	AT5G18660	Endodermis
AT5G37390	AT5G37400	Endodermis
AT2G43480	AT2G43490	Endodermis
AT5G58940	AT5G58950	Endodermis
AT1G70060	AT1G70070	Endodermis
AT1G63300	AT1G63310	Endodermis
AT1G08390	AT1G08400	Endodermis
AT3G12360	AT3G12370	Endodermis
AT1G29900	AT1G29910	Endodermis
AT3G11460	AT3G11470	Endodermis
AT4G24880	AT4G24890	Endodermis
AT5G16130	AT5G16140	Endodermis
AT2G44010	AT2G44020	Endodermis
AT5G34930	AT5G34940	Endodermis
AT1G77290	AT1G77300	Endodermis
AT1G73130	AT1G73140	Endodermis
AT2G30870	AT2G30880	Endodermis
AT5G15290	AT5G15300	Endodermis
AT4G09570	AT4G09580	Endodermis
AT3G57970	AT3G57980	Endodermis
AT5G51630	AT5G51640	Endodermis
AT1G56170	AT1G56180	Endodermis
AT1G05380	AT1G05385	Endodermis
AT3G07900	AT3G07910	Endodermis
AT3G15250	AT3G15251	Endodermis
AT1G52420	AT1G52430	Endodermis
AT1G50410	AT1G50420	Endodermis
AT3G20380	AT3G20390	Endodermis
AT5G65180	AT5G65200	Endodermis
AT2G07685	AT2G07686	Endodermis
AT4G13345	AT4G13350	Endodermis
AT1G26900	AT1G26910	Endodermis
AT4G16710	AT4G16720	Endodermis
AT1G48540	AT1G48550	Endodermis
AT1G03440	AT1G03445	Endodermis
AT1G58210	AT1G58220	Endodermis
AT5G57340	AT5G57345	Endodermis
AT3G53000	AT3G53010	Endodermis
AT1G78300	AT1G78310	Endodermis
AT1G33470	AT1G33475	Endodermis
AT5G58240	AT5G58250	Endodermis
AT2G18220	AT2G18230	Endodermis
AT4G25250	AT4G25260	Endodermis
AT4G14120	AT4G14130	Endodermis
AT5G57970	AT5G57980	Endodermis
AT4G18730	AT4G18740	Endodermis
AT1G15570	AT1G15580	Endodermis
AT1G10960	AT1G10970	Endodermis
AT4G03010	AT4G03020	Endodermis
AT5G28673	AT5G28675	Endodermis
AT3G48530	AT3G48540	Endodermis
AT5G16640	AT5G16650	Endodermis
AT5G15330	AT5G15340	Endodermis
AT3G53140	AT3G53150	Endodermis
AT5G25050	AT5G25060	Endodermis
AT2G23130	AT2G23140	Endodermis
AT3G59900	AT3G59910	Endodermis
AT2G17140	AT2G17150	Endodermis
AT5G21070	AT5G21080	Endodermis
AT5G47880	AT5G47890	Endodermis
AT1G61410	AT1G61415	Endodermis
AT4G11810	AT4G11820	Endodermis
AT3G26410	AT3G26420	Endodermis
AT5G49160	AT5G49170	Endodermis
AT1G21340	AT1G21350	Endodermis
AT5G03620	AT5G03630	Endodermis
AT4G16150	AT4G16155	Endodermis
AT1G77530	AT1G77540	Endodermis
AT5G13850	AT5G13860	Endodermis
AT2G01200	AT2G01210	Endodermis
AT5G10790	AT5G10800	Endodermis
AT5G10510	AT5G10520	Endodermis
AT2G29540	AT2G29550	Endodermis
AT3G01890	AT3G01900	Endodermis
AT2G01735	AT2G01740	Endodermis
AT4G09649	AT4G09650	Endodermis
AT1G06660	AT1G06670	Endodermis
AT4G12005	AT4G12010	Endodermis
AT1G50310	AT1G50320	Endodermis
AT1G16790	AT1G16800	Endodermis
AT4G00450	AT4G00460	Endodermis
AT5G04080	AT5G04090	Endodermis
AT5G61010	AT5G61020	Endodermis
AT4G03410	AT4G03415	Endodermis
AT3G11830	AT3G11840	Endodermis
AT1G72010	AT1G72020	Endodermis
AT4G30130	AT4G30140	Endodermis
AT1G14890	AT1G14900	Endodermis
AT3G02515	AT3G02520	Endodermis
AT5G22690	AT5G22700	Endodermis
ATCG00680	ATCG00700	Endodermis
AT3G10400	AT3G10405	Endodermis
AT1G69350	AT1G69360	Endodermis
AT1G23010	AT1G23020	Endodermis
AT5G11690	AT5G11700	Endodermis
AT5G27000	AT5G27010	Endodermis
AT4G37300	AT4G37310	Endodermis
AT4G39540	AT4G39550	Endodermis
AT1G76630	AT1G76640	Cortex
AT1G59860	AT1G59865	Cortex
AT4G30100	AT4G30110	Cortex
AT3G63300	AT3G63310	Cortex
AT2G06045	AT2G06050	Cortex
AT5G07870	AT5G07880	Cortex
AT1G50740	AT1G50750	Cortex
AT5G43050	AT5G43060	Cortex
AT1G01730	AT1G01740	Cortex
AT1G18740	AT1G18745	Cortex
AT1G16370	AT1G16380	Cortex
AT5G21930	AT5G21940	Cortex
AT5G18960	AT5G18970	Cortex
AT2G31090	AT2G31100	Cortex
AT5G05160	AT5G05170	Cortex
AT1G74160	AT1G74170	Cortex
AT5G20250	AT5G20260	Cortex
AT3G62190	AT3G62200	Cortex
AT5G07610	AT5G07620	Cortex
AT3G23540	AT3G23550	Cortex
AT2G23200	AT2G23210	Cortex
AT1G72320	AT1G72330	Cortex
AT1G17500	AT1G17510	Cortex
AT4G23270	AT4G23271	Cortex
AT4G03490	AT4G03500	Cortex
AT3G15730	AT3G15740	Cortex
AT3G11810	AT3G11820	Cortex
AT5G06930	AT5G06940	Cortex
AT5G40440	AT5G40450	Cortex
AT3G61410	AT3G61415	Cortex
AT1G15160	AT1G15165	Cortex
AT3G52250	AT3G52260	Cortex
AT1G72710	AT1G72720	Cortex
AT2G02955	AT2G02960	Cortex
AT1G15190	AT1G15200	Cortex
AT2G29430	AT2G29440	Cortex
AT5G52580	AT5G52600	Cortex
AT1G73190	AT1G73200	Cortex
AT1G52780	AT1G52790	Cortex
AT1G06660	AT1G06670	Cortex
AT3G19240	AT3G19250	Cortex
AT2G34660	AT2G34670	Cortex
AT2G47090	AT2G47110	Cortex
AT5G59190	AT5G59200	Cortex
AT4G24570	AT4G24580	Cortex
AT1G14190	AT1G14200	Cortex
AT4G23840	AT4G23850	Cortex
AT3G57620	AT3G57630	Cortex
AT2G15970	AT2G15980	Cortex
AT1G05510	AT1G05520	Cortex
AT4G01533	AT4G01535	Cortex
AT3G17920	AT3G17930	Cortex
AT1G15260	AT1G15270	Cortex
AT5G05070	AT5G05080	Cortex
AT5G67100	AT5G67110	Cortex
AT5G19400	AT5G19410	Cortex
AT1G17200	AT1G17210	Cortex
AT3G12360	AT3G12370	Cortex
AT5G18140	AT5G18150	Cortex
AT3G16060	AT3G16070	Cortex
AT5G13280	AT5G13290	Cortex
AT1G15570	AT1G15580	Cortex
AT1G75261	AT1G75270	Cortex
AT3G14395	AT3G14400	Cortex
AT1G03990	AT1G04000	Cortex
AT3G55605	AT3G55610	Cortex
AT3G51540	AT3G51550	Cortex
AT3G57130	AT3G57140	Cortex
AT2G18700	AT2G18710	Cortex
AT1G48598	AT1G48605	Cortex
AT5G16730	AT5G16740	Cortex
AT1G35720	AT1G35730	Cortex
AT4G13860	AT4G13870	Cortex
AT4G14500	AT4G14510	Cortex
AT4G16480	AT4G16490	Cortex
AT2G03230	AT2G03240	Cortex
AT2G47010	AT2G47020	Cortex
AT5G42290	AT5G42300	Cortex
AT2G33570	AT2G33580	Cortex
AT1G79400	AT1G79410	Cortex
AT2G13550	AT2G13560	Cortex
AT3G62410	AT3G62420	Cortex
AT3G07005	AT3G07010	Cortex
AT4G37480	AT4G37490	Cortex
AT4G25860	AT4G25870	Cortex
AT5G52280	AT5G52290	Cortex
AT1G30455	AT1G30460	Cortex
AT4G34000	AT4G34020	Cortex
AT4G19210	AT4G19220	Cortex
AT3G29010	AT3G29020	Cortex
AT3G57910	AT3G57920	Cortex
AT1G18870	AT1G18871	Cortex
AT4G38590	AT4G38600	Cortex
AT4G29350	AT4G29360	Cortex
AT3G05310	AT3G05320	Cortex
AT4G39220	AT4G39230	Cortex
AT1G68050	AT1G68060	Cortex
AT1G09730	AT1G09740	Cortex
AT1G70100	AT1G70110	Cortex
AT5G25630	AT5G25640	Cortex
AT3G48140	AT3G48150	Cortex
AT1G10810	AT1G10820	Cortex
AT5G40850	AT5G40855	Cortex
AT3G18480	AT3G18485	Cortex
AT3G16460	AT3G16470	Cortex
AT1G10455	AT1G10460	Cortex
AT4G21820	AT4G21830	Cortex
AT1G17970	AT1G17980	Cortex
AT2G18770	AT2G18780	Cortex
AT4G38080	AT4G38090	Cortex
AT1G42980	AT1G42990	Cortex
AT1G10160	AT1G10170	Cortex
AT5G22810	AT5G22820	Cortex
AT5G05410	AT5G05420	Cortex
AT4G14890	AT4G14900	Cortex
AT1G16000	AT1G16010	Cortex
AT5G19520	AT5G19530	Cortex
AT4G14760	AT4G14770	Cortex
AT2G42650	AT2G42660	Cortex
AT4G27470	AT4G27480	Cortex
AT4G37710	AT4G37720	Cortex
AT4G31740	AT4G31750	Cortex
AT5G23590	AT5G23600	Cortex
AT2G17830	AT2G17840	Cortex
AT2G31820	AT2G31830	Cortex
AT2G46050	AT2G46060	Cortex
AT1G19850	AT1G19860	Cortex
AT1G08600	AT1G08610	Cortex
AT3G50230	AT3G50240	Cortex
AT1G53190	AT1G53200	Cortex
AT1G03580	AT1G03590	Cortex
AT4G22930	AT4G22940	Cortex
AT3G57072	AT3G57080	Cortex
AT1G74380	AT1G74390	Cortex
AT3G09430	AT3G09440	Cortex
AT4G28280	AT4G28290	Cortex
ATCG00690	ATCG00700	Cortex
AT3G52080	AT3G52090	Cortex
AT2G40030	AT2G40050	Cortex
AT1G64130	AT1G64140	Cortex
AT5G55530	AT5G55540	Cortex
AT5G47880	AT5G47890	Cortex
AT3G56250	AT3G56260	Cortex
AT3G03360	AT3G03370	Cortex
AT3G18800	AT3G18810	Cortex
AT4G29070	AT4G29080	Cortex
AT4G22520	AT4G22530	Cortex
AT3G04890	AT3G04900	Cortex
AT5G45430	AT5G45440	Cortex
AT3G06820	AT3G06830	Cortex
AT3G44180	AT3G44190	Cortex
AT3G10820	AT3G10840	Cortex
AT3G24715	AT3G24730	Cortex
AT4G00590	AT4G00600	Cortex
AT5G64270	AT5G64280	Cortex
AT2G31290	AT2G31300	Cortex
AT4G37690	AT4G37700	Cortex
AT2G46735	AT2G46740	Cortex
AT1G79950	AT1G79960	Cortex
AT4G33620	AT4G33625	Cortex
AT3G12760	AT3G12770	Cortex
AT4G27590	AT4G27595	Cortex
AT1G02010	AT1G02020	Cortex
AT1G06240	AT1G06250	Cortex
AT2G33160	AT2G33170	Cortex
AT5G03490	AT5G03495	Cortex
AT2G31910	AT2G31920	Cortex
AT4G29870	AT4G29880	Cortex
AT1G65010	AT1G65020	Cortex
AT4G29580	AT4G29590	Cortex
AT1G56700	AT1G56710	Cortex
AT3G48810	AT3G48820	Cortex
AT5G67470	AT5G67480	Cortex
AT5G56170	AT5G56180	Cortex
AT5G52170	AT5G52180	Cortex
AT4G28640	AT4G28650	Cortex
AT1G72870	AT1G72880	Cortex
AT5G17450	AT5G17460	Cortex
AT2G46320	AT2G46330	Cortex
AT5G12970	AT5G12980	Cortex
AT5G42480	AT5G42490	Cortex
AT1G34100	AT1G34110	Cortex
AT3G51480	AT3G51490	Cortex
AT4G26930	AT4G26940	Cortex
AT1G07850	AT1G07870	Cortex
AT3G27090	AT3G27095	Cortex
AT2G40160	AT2G40170	Cortex
AT3G10500	AT3G10510	Cortex
AT2G17690	AT2G17695	Cortex
AT1G20310	AT1G20320	Cortex
AT5G53520	AT5G53530	Cortex
AT5G15760	AT5G15770	Cortex
AT4G38880	AT4G38890	Cortex
AT2G43480	AT2G43490	Cortex
AT1G51670	AT1G51680	Cortex
AT5G65510	AT5G65520	Cortex
AT3G24590	AT3G24600	Cortex
AT5G65274	AT5G65280	Cortex
AT5G24930	AT5G24940	Cortex
AT1G19770	AT1G19780	Cortex
AT4G24900	AT4G24910	Cortex
AT2G01200	AT2G01210	Cortex
AT2G02760	AT2G02770	Cortex
AT3G24929	AT3G24982	Cortex
AT1G16740	AT1G16750	Cortex
AT1G05330	AT1G05340	Cortex
AT5G18890	AT5G18900	Cortex
AT1G77270	AT1G77280	Cortex
AT1G80470	AT1G80480	Cortex
AT5G67080	AT5G67090	Cortex
AT1G06030	AT1G06040	Cortex
AT5G08340	AT5G08350	Cortex
AT1G55325	AT1G55330	Cortex
AT1G54490	AT1G54500	Cortex
AT3G09370	AT3G09375	Cortex
AT1G70480	AT1G70490	Cortex
AT4G11000	AT4G11010	Cortex
AT5G08695	AT5G08710	Cortex
AT1G71400	AT1G71410	Cortex
AT1G66160	AT1G66170	Cortex
AT5G16320	AT5G16330	Cortex
AT3G60450	AT3G60460	Cortex
AT2G16630	AT2G16640	Cortex
AT4G32810	AT4G32820	Cortex
AT3G07200	AT3G07210	Cortex
AT4G14280	AT4G14290	Cortex
AT5G17830	AT5G17840	Cortex
AT1G07747	AT1G07750	Cortex
AT4G30130	AT4G30140	Cortex
AT5G03750	AT5G03760	Cortex
AT5G47800	AT5G47810	Cortex
AT4G13320	AT4G13330	Cortex
AT4G19000	AT4G19003	Cortex
AT1G08620	AT1G08630	Cortex
AT3G02380	AT3G02390	Cortex
AT2G40850	AT2G40860	Cortex
AT4G02970	AT4G02980	Cortex
AT5G28900	AT5G28910	Cortex
AT5G44330	AT5G44340	Cortex
AT4G01150	AT4G01160	Cortex
AT5G60170	AT5G60180	Cortex
AT3G06895	AT3G06910	Cortex
AT1G21450	AT1G21460	Cortex
AT5G10600	AT5G10605	Cortex
AT5G66590	AT5G66600	Cortex
AT3G04630	AT3G04640	Cortex
AT3G21050	AT3G21055	Cortex
AT5G01670	AT5G01680	Cortex
AT5G18650	AT5G18660	Cortex
AT2G30690	AT2G30695	Cortex
AT2G23808	AT2G23810	Cortex
AT1G33612	AT1G33615	Cortex
AT2G26135	AT2G26140	Cortex
AT4G11810	AT4G11820	Cortex
AT5G14360	AT5G14370	Cortex
AT2G41940	AT2G41945	Cortex
AT1G32480	AT1G32490	Cortex
AT5G03300	AT5G03310	Cortex
AT1G31860	AT1G31870	Cortex
AT1G05930	AT1G05940	Cortex
AT3G63520	AT3G63530	Cortex
AT4G20890	AT4G20900	Cortex
AT1G31910	AT1G31920	Cortex
AT5G12460	AT5G12470	Cortex
ATMG01390	ATMG01400	Cortex
AT3G14580	AT3G14590	Cortex
AT2G24960	AT2G24970	Cortex
AT1G11300	AT1G11310	Cortex
AT5G11170	AT5G11180	Cortex
AT4G39400	AT4G39403	Cortex
AT5G65495	AT5G65500	Cortex
AT1G68862	AT1G68870	Cortex
AT1G70518	AT1G70520	Cortex
AT1G15140	AT1G15150	Cortex
AT3G59500	AT3G59510	Cortex
AT4G31360	AT4G31370	Cortex
AT5G13580	AT5G13590	Cortex
AT1G77370	AT1G77380	Cortex
AT3G19910	AT3G19920	Cortex
AT2G38690	AT2G38695	Cortex
AT5G14160	AT5G14170	Cortex
AT5G24130	AT5G24140	Cortex
AT1G10150	AT1G10155	Cortex
AT1G20515	AT1G20530	Cortex
AT1G70060	AT1G70070	Cortex
AT1G69950	AT1G69960	Cortex
AT5G04510	AT5G04520	Cortex
AT3G17670	AT3G17680	Cortex
AT1G15240	AT1G15250	Cortex
AT5G04660	AT5G04670	Cortex
AT3G48020	AT3G48030	Cortex
AT4G38340	AT4G38350	Cortex
AT2G40980	AT2G40990	Cortex
AT3G12810	AT3G12820	Cortex
AT5G21070	AT5G21080	Cortex
AT4G31160	AT4G31170	Cortex
AT1G78890	AT1G78895	Cortex
AT2G27440	AT2G27450	Cortex
AT2G40935	AT2G40940	Cortex
AT3G18910	AT3G18930	Cortex
AT3G14140	AT3G14150	Cortex
AT5G04120	AT5G04130	Cortex
AT5G03345	AT5G03350	Cortex
AT1G64710	AT1G64720	Cortex
AT1G30620	AT1G30630	Cortex
AT5G58375	AT5G58380	Cortex
AT5G48620	AT5G48630	Cortex
AT5G14310	AT5G14320	Cortex
AT5G27650	AT5G27660	Cortex
AT3G17210	AT3G17220	Cortex
AT1G08000	AT1G08005	Cortex
AT3G47690	AT3G47700	Cortex
AT3G01185	AT3G01190	Cortex
AT5G04720	AT5G04730	Cortex
AT2G21550	AT2G21560	Cortex
AT4G35940	AT4G35950	Cortex
AT3G13210	AT3G13220	Cortex
AT3G54826	AT3G54830	Cortex
AT1G01010	AT1G01020	Cortex
AT4G11070	AT4G11080	Cortex
AT1G11060	AT1G11070	Cortex
AT1G52620	AT1G52630	Cortex
AT3G53670	AT3G53680	Cortex
AT1G29520	AT1G29530	Cortex
AT1G76730	AT1G76740	Cortex
AT1G18300	AT1G18310	Cortex
AT2G46020	AT2G46030	Cortex
AT2G42720	AT2G42730	Cortex
AT3G59790	AT3G59800	Cortex
AT2G22870	AT2G22880	Cortex
AT5G10790	AT5G10800	Cortex
AT4G16150	AT4G16155	Cortex
AT1G15125	AT1G15130	Cortex
AT2G33490	AT2G33500	Cortex
AT1G14390	AT1G14400	Cortex
AT5G45113	AT5G45116	Cortex
AT1G77290	AT1G77300	Cortex
AT5G44316	AT5G44320	Cortex
AT3G54970	AT3G54980	Cortex
AT4G29790	AT4G29800	Cortex
AT4G17215	AT4G17220	Cortex
AT1G53270	AT1G53280	Cortex
AT2G20208	AT2G20210	Cortex
AT5G13230	AT5G13240	Cortex
AT3G10800	AT3G10810	Cortex
AT5G66030	AT5G66040	Cortex
AT2G34630	AT2G34640	Cortex
AT2G29900	AT2G29910	Cortex
AT3G09050	AT3G09060	Cortex
AT1G60190	AT1G60200	Cortex
AT5G25260	AT5G25265	Cortex
AT3G16740	AT3G16750	Cortex
AT5G66830	AT5G66840	Cortex
AT1G51620	AT1G51630	Cortex
AT5G56590	AT5G56600	Cortex
AT3G20430	AT3G20440	Cortex
AT1G71520	AT1G71528	Cortex
AT4G04972	AT4G04980	Cortex
AT3G25400	AT3G25410	Cortex
AT1G63300	AT1G63310	Cortex
AT4G15030	AT4G15040	Cortex
AT5G09220	AT5G09225	Cortex
AT1G32390	AT1G32400	Cortex
AT3G15111	AT3G15115	Cortex
AT3G02200	AT3G02210	Cortex
AT1G56430	AT1G56440	Cortex
AT3G23109	AT3G23120	Cortex
AT3G20541	AT3G20550	Cortex
AT2G29380	AT2G29390	Cortex
AT5G57970	AT5G57980	Cortex
AT4G13870	AT4G13880	Cortex
AT3G04660	AT3G04670	Cortex
AT3G02300	AT3G02310	Cortex
AT3G51150	AT3G51160	Cortex
AT1G23880	AT1G23890	Cortex
AT2G29640	AT2G29650	Cortex
AT1G69350	AT1G69360	Cortex
AT4G11330	AT4G11340	Cortex
AT1G63380	AT1G63390	Cortex
AT5G08760	AT5G08770	Cortex
AT1G34420	AT1G34430	Cortex
AT2G32640	AT2G32650	Cortex
AT3G22430	AT3G22436	Cortex
AT5G15710	AT5G15720	Cortex
AT5G01980	AT5G01990	Cortex
AT1G07250	AT1G07260	Cortex
AT3G04140	AT3G04150	Cortex
AT3G03570	AT3G03580	Cortex
AT1G17470	AT1G17480	Cortex
AT2G34440	AT2G34450	Cortex
AT2G37560	AT2G37570	Cortex
AT1G10960	AT1G10970	Cortex
AT1G05140	AT1G05150	Cortex
AT5G12110	AT5G12120	Cortex
AT1G09900	AT1G09910	Cortex
AT3G05840	AT3G05850	Cortex
AT1G06680	AT1G06690	Cortex
AT5G12130	AT5G12140	Cortex
AT4G18596	AT4G18600	Cortex
AT3G11020	AT3G11030	Cortex
AT4G35350	AT4G35360	Cortex
AT3G48160	AT3G48170	Cortex
AT1G01920	AT1G01930	Cortex
ATCG01040	ATCG01050	Cortex
AT1G50310	AT1G50320	Cortex
AT5G18500	AT5G18510	Cortex
AT5G01260	AT5G01270	Cortex
AT3G58570	AT3G58580	Cortex
AT1G68020	AT1G68030	Cortex
AT1G75770	AT1G75780	Cortex
AT1G79890	AT1G79900	Cortex
AT4G00895	AT4G00900	Cortex
AT5G66950	AT5G66960	Cortex
AT3G07790	AT3G07800	Cortex
AT1G70120	AT1G70130	Cortex
AT1G20830	AT1G20840	Cortex
AT2G45960	AT2G45970	Cortex
AT4G39060	AT4G39070	Cortex
AT2G23970	AT2G23980	Cortex
AT1G63460	AT1G63470	Cortex
AT3G47150	AT3G47160	Cortex
AT3G22780	AT3G22790	Cortex
AT4G39540	AT4G39550	Cortex
AT3G09230	AT3G09240	Cortex
AT4G05020	AT4G05030	Cortex
AT5G28673	AT5G28675	Cortex
AT1G77320	AT1G77330	Cortex
AT5G03470	AT5G03480	Cortex
AT3G48530	AT3G48540	Cortex
AT3G27884	AT3G27886	Cortex
AT3G57450	AT3G57460	Cortex
AT5G27630	AT5G27640	Cortex
AT1G09650	AT1G09660	Cortex
AT2G17630	AT2G17640	Cortex
AT4G30960	AT4G30970	Cortex
AT5G02150	AT5G02160	Cortex
AT2G28440	AT2G28450	Cortex
AT3G28956	AT3G28958	Cortex
AT1G16250	AT1G16260	Cortex
AT5G35980	AT5G35995	Cortex
AT5G61950	AT5G61960	Cortex
AT2G26340	AT2G26350	Cortex
AT3G62970	AT3G62980	Cortex
AT2G42060	AT2G42070	Cortex
AT1G75200	AT1G75210	Cortex
AT1G26260	AT1G26270	Cortex
AT1G58070	AT1G58080	Cortex
AT3G46520	AT3G46530	Cortex
AT3G23480	AT3G23490	Cortex
AT5G64030	AT5G64040	Cortex
AT4G26070	AT4G26080	Cortex
AT1G09310	AT1G09320	Cortex
AT3G57570	AT3G57580	Cortex
AT2G22080	AT2G22090	Cortex
AT4G23180	AT4G23190	Cortex
AT1G62020	AT1G62030	Cortex
AT5G13530	AT5G13548	Cortex
AT3G07550	AT3G07560	Cortex
AT3G10400	AT3G10405	Cortex
AT3G01790	AT3G01800	Cortex
AT3G05250	AT3G05260	Cortex
AT4G13390	AT4G13395	Cortex
AT1G32060	AT1G32070	Cortex
AT5G10050	AT5G10060	Cortex
AT2G44730	AT2G44735	Cortex
AT2G01110	AT2G01120	Cortex
AT3G20280	AT3G20290	Cortex
AT3G08560	AT3G08570	Cortex
AT5G58940	AT5G58950	Cortex
AT1G78300	AT1G78310	Cortex
AT5G42980	AT5G42990	Cortex
AT1G76728	AT1G76730	Cortex
AT1G13110	AT1G13120	Cortex
AT1G56170	AT1G56180	Cortex
AT1G77930	AT1G77940	Cortex
AT2G47820	AT2G47830	Cortex
AT1G76070	AT1G76080	Cortex
AT3G12380	AT3G12390	Cortex
AT2G38340	AT2G38350	Cortex
AT3G48070	AT3G48080	Cortex
AT1G15175	AT1G15180	Cortex
AT2G07681	AT2G07682	Cortex
AT1G23940	AT1G23950	Cortex
AT3G12930	AT3G12940	Cortex
AT3G48470	AT3G48480	Cortex
AT4G05520	AT4G05523	Cortex
AT1G19190	AT1G19200	Cortex
AT1G65840	AT1G65845	Cortex
AT4G25250	AT4G25260	Cortex
AT1G51450	AT1G51460	Cortex
AT5G38350	AT5G38360	Cortex
AT1G05630	AT1G05640	Cortex
AT4G37130	AT4G37140	Cortex
AT4G36540	AT4G36550	Cortex
AT2G45310	AT2G45320	Cortex
AT2G03330	AT2G03340	Cortex
AT3G11460	AT3G11470	Cortex
AT4G33600	AT4G33610	Cortex
AT3G06700	AT3G06710	Cortex
AT1G06470	AT1G06475	Cortex
AT5G25520	AT5G25530	Cortex
AT2G39190	AT2G39200	Cortex
AT1G65590	AT1G65610	Cortex
AT2G44430	AT2G44440	Cortex
AT2G48130	AT2G48140	Cortex
AT1G20060	AT1G20065	Cortex
AT2G04350	AT2G04360	Cortex
AT5G21280	AT5G21970	Cortex
AT1G74870	AT1G74875	Cortex
AT1G21340	AT1G21350	Cortex
AT5G05230	AT5G05240	Cortex
AT2G17440	AT2G17442	Cortex
AT4G27290	AT4G27300	Cortex
AT5G10680	AT5G10690	Cortex
AT2G46200	AT2G46210	Cortex
AT4G18465	AT4G18480	Cortex
AT2G31970	AT2G31980	Cortex
AT3G54870	AT3G54880	Cortex
AT3G26410	AT3G26420	Cortex
AT3G59390	AT3G59400	Cortex
AT5G08300	AT5G08305	Cortex
AT1G05380	AT1G05385	Cortex
AT2G33255	AT2G33260	Cortex
AT4G34600	AT4G34610	Cortex
AT4G18740	AT4G18750	Cortex
AT3G02720	AT3G02730	Cortex
AT1G18320	AT1G18330	Cortex
AT3G03710	AT3G03720	Cortex
AT2G25840	AT2G25850	Cortex
AT3G32930	AT3G32940	Cortex
AT2G28320	AT2G28330	Cortex
AT5G06580	AT5G06590	Cortex
AT3G12990	AT3G13000	Cortex
AT2G45860	AT2G45870	Cortex
