# Supplementary figures and images for: Integrated detection of natural antisense transcripts using strand-specific RNA sequencing data
Source: HighWire-hosted journal article supplement (doi:10.1101/gr.149310.112), 2013-07-01

Supplemental Figure 1

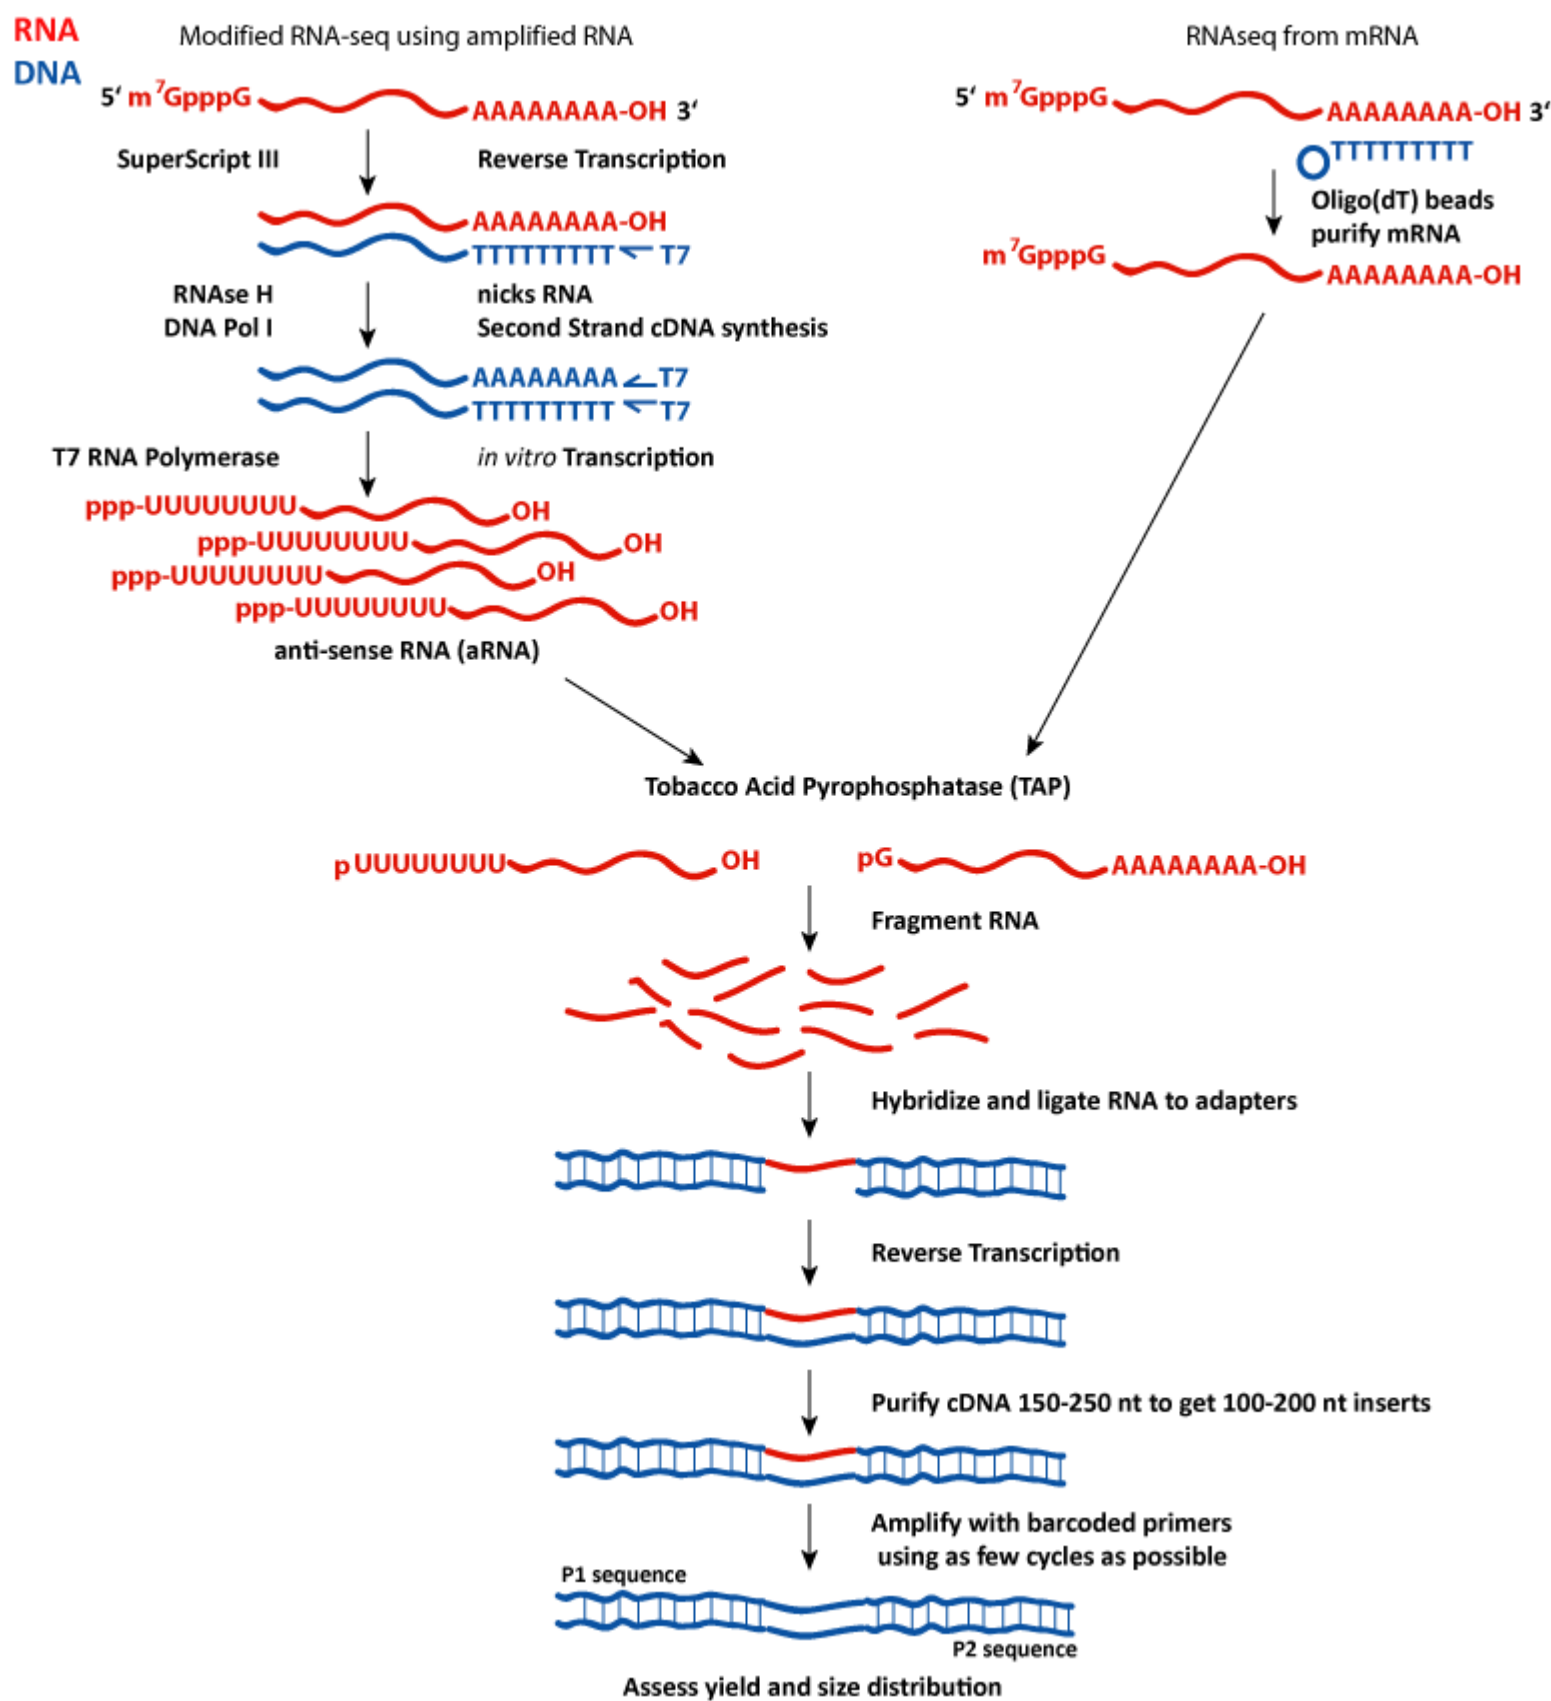

Supplement: Supplemental_Figure1.pdf [file Supplemental_Figure1.pdf]

Supplemental Figure 6

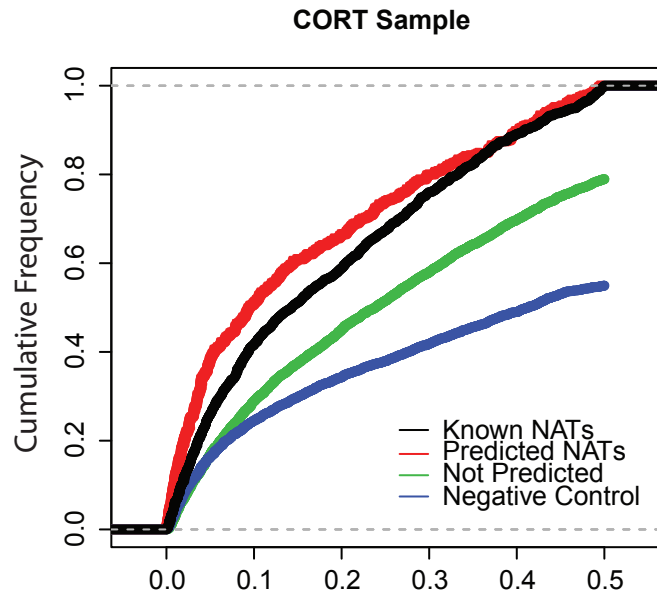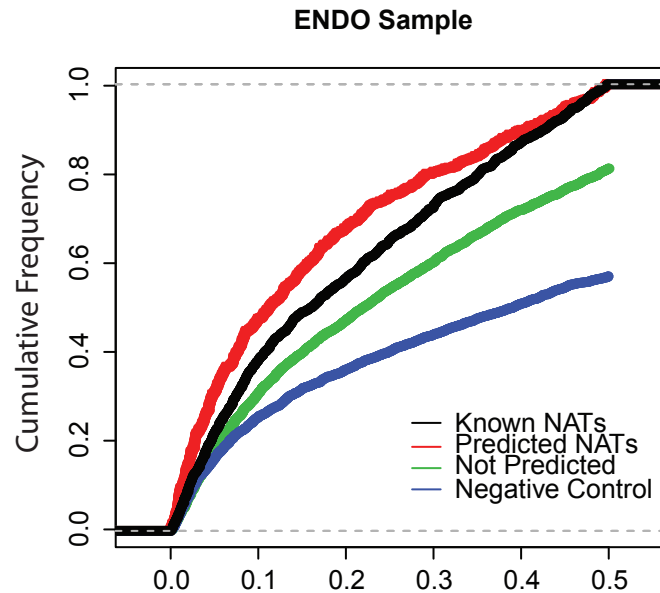

$$\Psi = \frac{MinorFPKM + 1}{(MajorFPKM + 1) + (MinorFPKM + 1)}$$

Supplement: Supplemental_Figure6.pdf [file Supplemental_Figure6.pdf]

Supplemental Figure 7

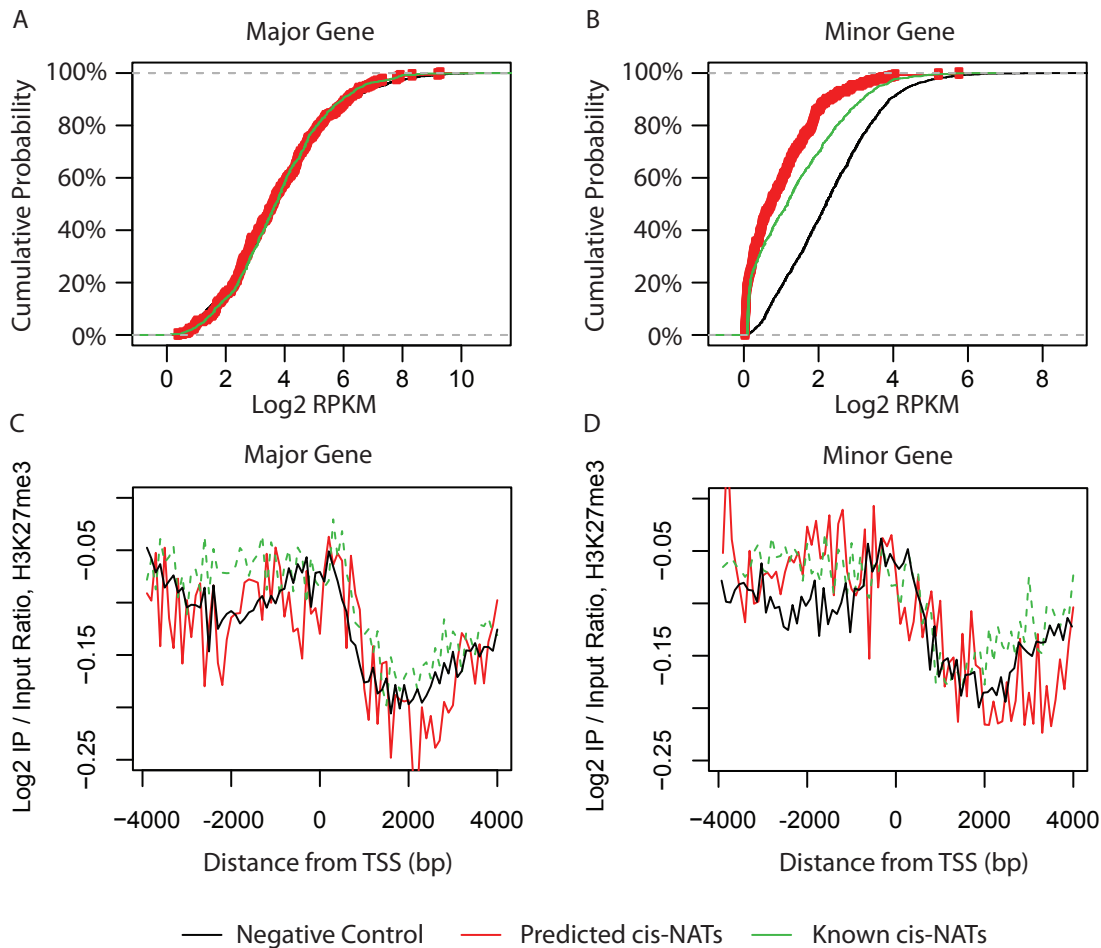

Supplement: Supplemental_Figure7.pdf [file Supplemental_Figure7.pdf]

Supplemental Figure 8

A

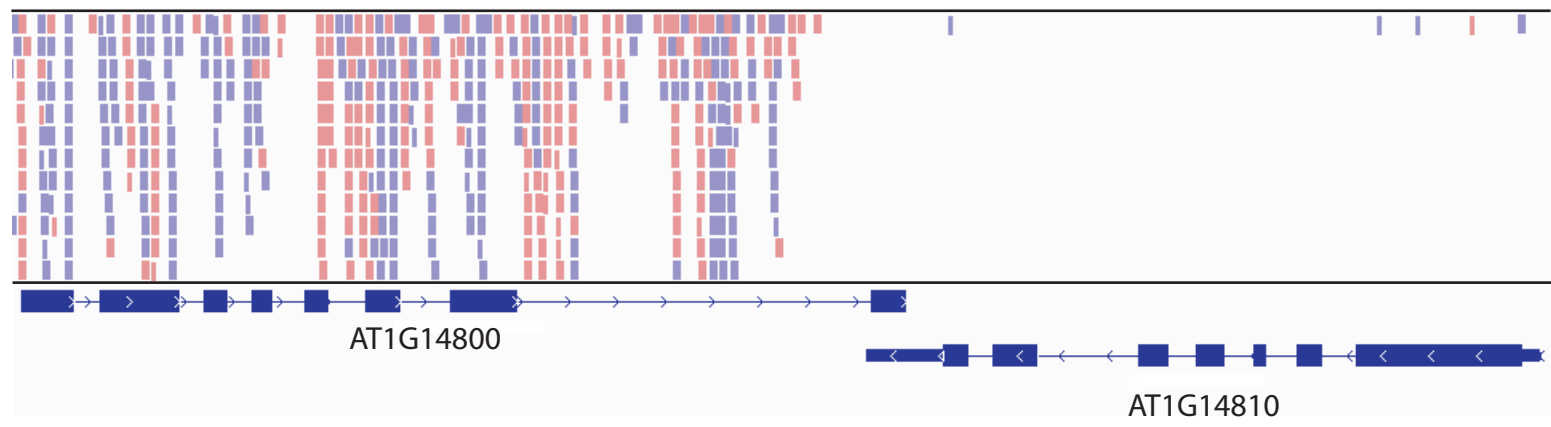

B

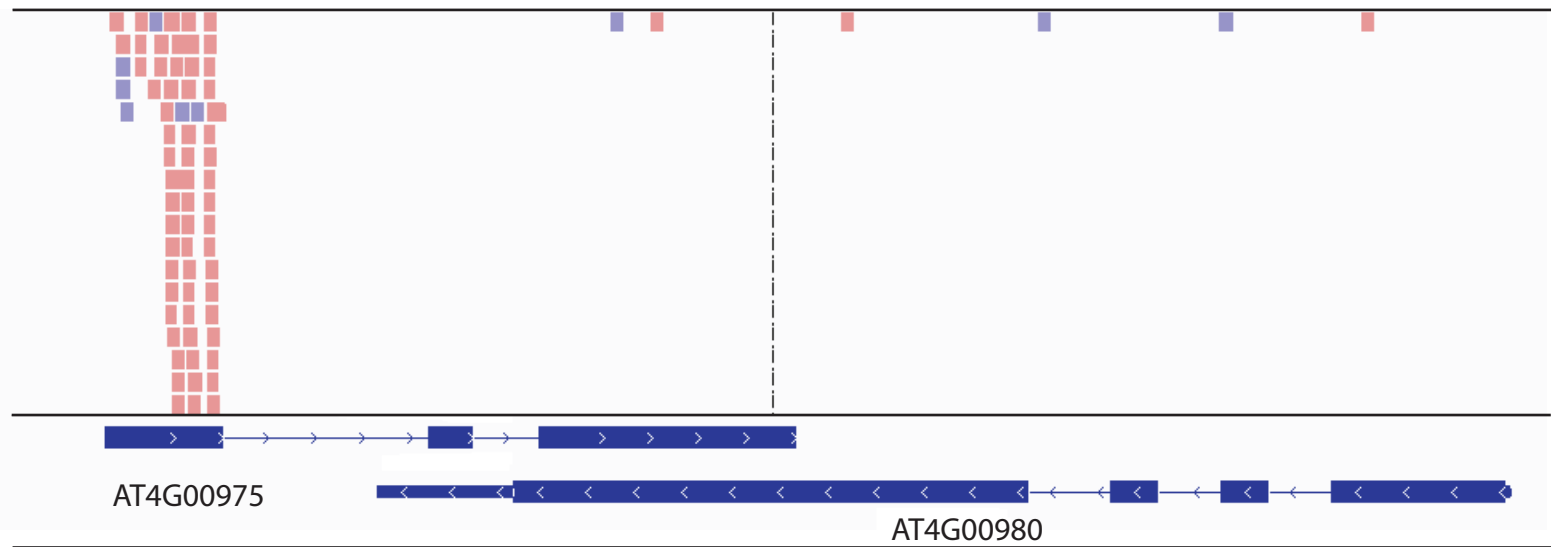

Supplement: Supplemental_Figure8.pdf [file Supplemental_Figure8.pdf]
